# Supplementary material for: Hypothalamic transcriptomes of 99 mouse strains reveal trans eQTL hotspots, splicing QTLs and novel non-coding genes
Source: eLife. 2016 Sep 13;5:e15614. doi: 10.7554/eLife.15614 (PMC5053804; doi:10.7554/eLife.15614)
Supplement: Supplementary file 1. — (A) Annotation of novel genes and transcripts Basic annotation data of all transcripts classified as 'new locus' (class code = u).Data includes tracking ID of the transcript and gene, locus position, number of samples where transcript is detected (FPKM>1e-6) and number of samples where transcript is expressed (FPKM >1), mean expression across all samples and if gene arises from uniquely mapped reads. (B) Annotation of detected peptides Basic annotation data of all peptides detected by LC-MS proteomics. Data includes peptide sequence, tracking ids of matching transcripts (known, novel isoforms and novel genes, based on Cufflinks class code classification), number and list of strains in which the peptide was detected, and number of transcripts the peptide may be attributed to. (C) Sample description. Technical metadata pertaining to samples used in this study, including NCBI SRA accession numbers, RNA-Seq QC data (number of reads, mapped reads, detected junctions), and mouse id and strain. DOI: http://dx.doi.org/10.7554/eLife.15614.016 [file elife-15614-supp1.xlsx]

## Sheet: a_Novel_genes
Table 1
tracking_id	class_code	nearest_ref_id	gene_id	gene_short_name	tss_id	locus	length	Mean	N_detect	N_exp	Gene_unique
TCONS_00001493	u	-	XLOC_000116	-	TSS293	chr1:36716472-36744844	2649	2.21359	281	279	Yes
TCONS_00004083	u	-	XLOC_000253	-	TSS643	chr1:60597884-60705714	1795	1.83627	282	272	No
TCONS_00014439	u	-	XLOC_000888	-	TSS2287	chr1:177670576-178259528	7387	1.31326	282	251	Yes
TCONS_00014464	u	-	XLOC_000888	-	TSS2292	chr1:177670576-178259528	1104	0.668972	170	52	Yes
TCONS_00015246	u	-	XLOC_000926	-	TSS2420	chr1:182124300-182462479	3155	0.962845	212	95	Yes
TCONS_00015248	u	-	XLOC_000926	-	TSS2420	chr1:182124300-182462479	3154	0.609792	186	70	Yes
TCONS_00015253	u	-	XLOC_000926	-	TSS2420	chr1:182124300-182462479	3118	1.92801	249	185	Yes
TCONS_00017595	u	-	XLOC_001137	-	TSS2953	chr1:36716472-36744844	6664	1.7733	281	273	Yes
TCONS_00017946	u	-	XLOC_001179	-	TSS3091	chr1:43932085-44007657	396	0.636621	222	55	No
TCONS_00019448	u	-	XLOC_001407	-	TSS3731	chr1:87140296-87147447	4381	0.844024	282	64	Yes
TCONS_00019809	u	-	XLOC_001478	-	TSS3895	chr1:99772179-100490731	229	2.42631	216	179	Yes
TCONS_00020964	u	-	XLOC_001683	-	TSS4419	chr1:151294670-151364910	4496	0.598024	280	61	Yes
TCONS_00022377	u	-	XLOC_001912	-	TSS5042	chr1:177670576-178259528	463	0.808402	185	81	No
TCONS_00023120	u	-	XLOC_002074	-	TSS5405	chr1:43887984-43888606	622	1.30818	258	166	No
TCONS_00023124	u	-	XLOC_002078	-	TSS5409	chr1:46066526-46431085	355	0.629891	197	67	No
TCONS_00023125	u	-	XLOC_002079	-	TSS5410	chr1:47364993-47365310	317	1.29617	249	171	Yes
TCONS_00023126	u	-	XLOC_002080	-	TSS5411	chr1:49555435-49556004	569	3.10819	185	151	No
TCONS_00023160	u	-	XLOC_002114	-	TSS5445	chr1:71155549-71155735	186	1.42605	124	124	No
TCONS_00023187	u	-	XLOC_002141	-	TSS5472	chr1:85479331-85479551	220	1.35931	165	159	Yes
TCONS_00023235	u	-	XLOC_002189	-	TSS5520	chr1:122875250-122875993	743	0.851269	151	116	No
TCONS_00023263	u	-	XLOC_002216	-	TSS5548	chr1:140047587-140048280	693	2.40497	241	179	No
TCONS_00023269	u	-	XLOC_002222	-	TSS5554	chr1:151520307-151520501	194	1.29456	128	128	No
TCONS_00023322	u	-	XLOC_002273	-	TSS5607	chr1:166974023-167162228	2127	0.611607	150	94	No
TCONS_00023369	u	-	XLOC_002319	-	TSS5654	chr1:179648610-179649162	552	5.71395	229	225	Yes
TCONS_00023373	u	-	XLOC_002323	-	TSS5658	chr1:179958479-179960252	1773	1.15565	282	184	Yes
TCONS_00025094	u	-	XLOC_002511	-	TSS6047	chr10:26695317-26919765	452	1.81266	276	225	Yes
TCONS_00033546	u	-	XLOC_002960	-	TSS7318	chr10:96077523-96077970	447	1409.73	282	282	Yes
TCONS_00036189	u	-	XLOC_003129	-	TSS7785	chr10:128446194-128450330	710	0.863466	260	81	Yes
TCONS_00037030	u	-	XLOC_003253	-	TSS8086	chr10:22038301-22058681	464	2.54078	233	226	Yes
TCONS_00037304	u	-	XLOC_003312	-	TSS8208	chr10:31689292-32893883	2803	0.867683	278	58	Yes
TCONS_00037305	u	-	XLOC_003312	-	TSS8209	chr10:31689292-32893883	2765	6.6281	281	242	Yes
TCONS_00037307	u	-	XLOC_003312	-	TSS8210	chr10:31689292-32893883	2797	2.60265	281	156	Yes
TCONS_00040641	u	-	XLOC_003796	-	TSS9567	chr10:110088536-110456068	852	1.21962	269	161	Yes
TCONS_00040642	u	-	XLOC_003796	-	TSS9567	chr10:110088536-110456068	906	1.05864	265	130	Yes
TCONS_00040648	u	-	XLOC_003796	-	TSS9567	chr10:110088536-110456068	738	0.667478	265	53	Yes
TCONS_00040974	u	-	XLOC_003857	-	TSS9722	chr10:121409026-121533698	258	1.29453	183	131	Yes
TCONS_00041111	u	-	XLOC_003884	-	TSS9780	chr10:127070356-127121297	612	0.632927	244	60	Yes
TCONS_00041502	u	-	XLOC_003977	-	TSS9972	chr10:130365959-130578730	379	1.17691	236	135	Yes
TCONS_00041609	u	-	XLOC_004084	-	TSS10082	chr10:33808169-33809572	1403	1.22902	282	194	Yes
TCONS_00041611	u	-	XLOC_004086	-	TSS10084	chr10:34898619-34898798	179	1.44075	111	111	No
TCONS_00041616	u	-	XLOC_004091	-	TSS10089	chr10:42052546-42055471	2925	1.13828	176	142	No
TCONS_00041625	u	-	XLOC_004100	-	TSS10098	chr10:49788821-49789120	299	0.885051	202	105	No
TCONS_00041650	u	-	XLOC_004125	-	TSS10123	chr10:77652735-77653341	606	1.02094	230	129	No
TCONS_00041724	u	-	XLOC_004199	-	TSS10197	chr10:116972631-116973495	864	0.91124	276	93	No
TCONS_00041749	u	-	XLOC_004224	-	TSS10222	chr10:127225694-127312798	2389	0.841776	282	66	Yes
TCONS_00041751	u	-	XLOC_004225	-	TSS10224	chr10:127313552-127313847	295	0.751107	125	66	No
TCONS_00043207	u	-	XLOC_004325	-	TSS10510	chr11:19720235-19732782	1339	1.05772	280	117	No
TCONS_00043208	u	-	XLOC_004325	-	TSS10511	chr11:19720235-19732782	657	5.0009	235	63	No
TCONS_00047707	u	-	XLOC_004684	-	TSS11407	chr11:63312094-63499802	1297	1.73179	239	184	Yes
TCONS_00047708	u	-	XLOC_004684	-	TSS11407	chr11:63312094-63499802	764	6.57019	274	211	Yes
TCONS_00048753	u	-	XLOC_004769	-	TSS11687	chr11:70307740-70359687	1715	1.45169	278	162	No
TCONS_00052030	u	-	XLOC_004985	-	TSS12386	chr11:86201327-86369863	635	4.22888	281	278	Yes
TCONS_00059866	u	-	XLOC_005550	-	TSS14202	chr11:16493376-16636158	2076	3.06121	245	173	No
TCONS_00060781	u	-	XLOC_005735	-	TSS14678	chr11:50024960-50126034	6378	5.81318	282	280	Yes
TCONS_00067492	u	-	XLOC_006903	-	TSS17818	chr11:73771929-73772204	275	0.538954	132	64	Yes
TCONS_00067536	u	-	XLOC_006947	-	TSS17862	chr11:100360956-100362158	1202	3.2181	282	246	No
TCONS_00069194	u	-	XLOC_007066	-	TSS18136	chr12:17690713-18339128	3517	0.846541	213	117	Yes
TCONS_00069196	u	-	XLOC_007066	-	TSS18137	chr12:17690713-18339128	2069	0.707316	253	91	Yes
TCONS_00069197	u	-	XLOC_007066	-	TSS18138	chr12:17690713-18339128	508	0.789574	196	87	Yes
TCONS_00069207	u	-	XLOC_007071	-	TSS18146	chr12:18558807-18778858	525	0.761964	179	109	Yes
TCONS_00069211	u	-	XLOC_007074	-	TSS18150	chr12:19098115-19098223	108	38.2913	125	125	No
TCONS_00069372	u	-	XLOC_007100	-	TSS18203	chr12:21678358-22364584	580	0.56166	144	71	No
TCONS_00069379	u	-	XLOC_007105	-	TSS18209	chr12:22558890-22559202	312	1.46322	175	145	No
TCONS_00071977	u	-	XLOC_007233	-	TSS18525	chr12:56381010-56639896	2712	0.941354	278	107	Yes
TCONS_00071978	u	-	XLOC_007234	-	TSS18526	chr12:56381010-56639896	13352	1.04634	282	148	Yes
TCONS_00072445	u	-	XLOC_007267	-	TSS18605	chr12:69122969-69123967	942	0.626428	229	59	No
TCONS_00073774	u	-	XLOC_007312	-	TSS18725	chr12:74887157-75177648	5343	1.28923	280	183	Yes
TCONS_00075286	u	-	XLOC_007380	-	TSS18944	chr12:84258262-84284498	712	1.38969	272	138	No
TCONS_00075287	u	-	XLOC_007380	-	TSS18944	chr12:84258262-84284498	306	2.38211	271	194	No
TCONS_00076212	u	-	XLOC_007453	-	TSS19112	chr12:97061422-97061819	397	479.498	282	282	Yes
TCONS_00079800	u	-	XLOC_007675	-	TSS19773	chr12:10092721-10160217	872	4.14271	224	146	No
TCONS_00079801	u	-	XLOC_007675	-	TSS19773	chr12:10092721-10160217	8077	1.13363	282	134	No
TCONS_00079955	u	-	XLOC_007707	-	TSS19845	chr12:17690713-18339128	2067	1.41846	282	234	Yes
TCONS_00079957	u	-	XLOC_007703	-	TSS19840	chr12:17690713-18339128	704	0.923977	235	103	Yes
TCONS_00079967	u	-	XLOC_007716	-	TSS19855	chr12:19989215-20545947	433	0.463658	161	51	No
TCONS_00080948	u	-	XLOC_007847	-	TSS20214	chr12:56381010-56639896	3159	1.41225	281	223	Yes
TCONS_00081071	u	-	XLOC_007874	-	TSS20293	chr12:69122969-69123967	998	0.571649	231	64	No
TCONS_00082409	u	-	XLOC_008117	-	TSS20929	chr12:104189647-104190429	144	5.43316	104	104	No
TCONS_00083291	u	-	XLOC_008493	-	TSS21468	chr12:49840562-49841049	487	0.866463	212	113	No
TCONS_00083292	u	-	XLOC_008494	-	TSS21469	chr12:51133271-51134990	1719	5.69134	278	236	No
TCONS_00083297	u	-	XLOC_008499	-	TSS21474	chr12:56373504-56373872	368	0.979982	178	53	No
TCONS_00083303	u	-	XLOC_008505	-	TSS21480	chr12:59200586-59391952	228	20.7344	282	282	Yes
TCONS_00083323	u	-	XLOC_008525	-	TSS21500	chr12:77624238-77625090	852	0.652884	173	97	No
TCONS_00083348	u	-	XLOC_008550	-	TSS21525	chr12:94200244-94200769	525	0.530793	143	65	No
TCONS_00083374	u	-	XLOC_008576	-	TSS21551	chr12:110447132-110583187	2793	1.9282	282	279	Yes
TCONS_00083412	u	-	XLOC_008611	-	TSS21589	chr13:3298719-3299773	1054	17.1454	282	282	No
TCONS_00085162	u	-	XLOC_008800	-	TSS21940	chr13:28395839-28420361	24188	1.3093	281	205	Yes
TCONS_00085625	u	-	XLOC_008844	-	TSS22026	chr13:34179081-34347008	1728	0.887151	258	120	Yes
TCONS_00089048	u	-	XLOC_009039	-	TSS22553	chr13:64928241-64934468	432	1.00103	195	133	No
TCONS_00089223	u	-	XLOC_009070	-	TSS22603	chr13:68468924-68469121	197	2.90017	170	170	No
TCONS_00094330	u	-	XLOC_009482	-	TSS23542	chr13:28395839-28420361	23342	0.582495	278	56	Yes
TCONS_00094331	u	-	XLOC_009482	-	TSS23542	chr13:28395839-28420361	12946	0.720041	267	89	Yes
TCONS_00094340	u	-	XLOC_009482	-	TSS23542	chr13:28395839-28420361	22400	0.637158	274	60	Yes
TCONS_00094343	u	-	XLOC_009482	-	TSS23542	chr13:28395839-28420361	12890	0.794675	276	105	Yes
TCONS_00094816	u	-	XLOC_009576	-	TSS23771	chr13:46741825-47106221	513	0.684638	244	62	Yes
TCONS_00095018	u	-	XLOC_009605	-	TSS23841	chr13:51079223-51100776	1603	0.880268	282	94	Yes
TCONS_00095381	u	-	XLOC_009659	-	TSS24000	chr13:56747331-56896054	1864	2.20212	282	272	Yes
TCONS_00095678	u	-	XLOC_009716	-	TSS24142	chr13:62812932-62815125	2193	1.16285	282	99	No
TCONS_00097468	u	-	XLOC_010009	-	TSS24893	chr13:12259862-12260272	410	0.990614	209	78	No
TCONS_00097479	u	-	XLOC_010020	-	TSS24904	chr13:16430971-16431838	867	0.587204	221	77	No
TCONS_00097485	u	-	XLOC_010026	-	TSS24910	chr13:21381377-21382137	760	1.23479	208	60	No
TCONS_00097561	u	-	XLOC_010102	-	TSS24986	chr13:54499345-54500266	921	4.10284	282	282	No
TCONS_00097603	u	-	XLOC_010144	-	TSS25028	chr13:68469250-68469497	247	0.767739	125	92	No
TCONS_00097681	u	-	XLOC_010222	-	TSS25106	chr13:116153757-116154182	425	1.05431	253	121	No
TCONS_00097699	u	-	XLOC_010240	-	TSS25124	chr13:119790908-119792068	1160	0.756364	281	53	Yes
TCONS_00105672	u	-	XLOC_010945	-	TSS26697	chr14:76635401-76805291	428	0.867074	248	98	No
TCONS_00107526	u	-	XLOC_011141	-	TSS27112	chr14:9501878-9529510	744	0.793314	272	79	Yes
TCONS_00109822	u	-	XLOC_011558	-	TSS28186	chr14:62540352-62541610	1258	1.05359	281	64	No
TCONS_00111144	u	-	XLOC_011754	-	TSS28699	chr14:105620884-105643766	2927	0.702087	204	85	Yes
TCONS_00111145	u	-	XLOC_011754	-	TSS28699	chr14:105620884-105643766	3196	1.48076	275	198	Yes
TCONS_00111510	u	-	XLOC_011871	-	TSS28904	chr14:43088776-43187988	1064	0.551371	235	68	No
TCONS_00111523	u	-	XLOC_011884	-	TSS28917	chr14:49823107-49823357	250	0.650381	117	80	No
TCONS_00111525	u	-	XLOC_011886	-	TSS28919	chr14:50978175-50978952	777	0.805375	277	66	No
TCONS_00111540	u	-	XLOC_011901	-	TSS28934	chr14:56010173-56011491	1318	0.861942	257	130	No
TCONS_00111541	u	-	XLOC_011902	-	TSS28935	chr14:56250400-56250783	383	0.612904	169	70	No
TCONS_00111543	u	-	XLOC_011904	-	TSS28937	chr14:56867345-56867572	227	0.989374	145	126	No
TCONS_00111575	u	-	XLOC_011936	-	TSS28969	chr14:68125117-68125499	382	9.53798	281	281	Yes
TCONS_00111576	u	-	XLOC_011937	-	TSS28970	chr14:68126884-68129778	2894	4.60007	282	282	Yes
TCONS_00111577	u	-	XLOC_011938	-	TSS28971	chr14:68129953-68130462	509	5.97631	282	281	Yes
TCONS_00111578	u	-	XLOC_011939	-	TSS28972	chr14:68130562-68131303	741	10.2329	282	282	Yes
TCONS_00111683	u	-	XLOC_012042	-	TSS29077	chr15:3190199-3218392	233	1.94221	223	183	Yes
TCONS_00113400	u	-	XLOC_012136	-	TSS29342	chr15:32778517-33035097	1866	2.07821	280	249	Yes
TCONS_00114336	u	-	XLOC_012188	-	TSS29478	chr15:44671788-44910260	4010	0.807282	232	90	Yes
TCONS_00114337	u	-	XLOC_012188	-	TSS29478	chr15:44671788-44910260	4002	1.60616	269	165	Yes
TCONS_00114338	u	-	XLOC_012188	-	TSS29479	chr15:44671788-44910260	11793	0.924789	282	89	Yes
TCONS_00115266	u	-	XLOC_012257	-	TSS29638	chr15:73423271-73450586	844	1.04651	281	139	Yes
TCONS_00119735	u	-	XLOC_012489	-	TSS30381	chr15:93001438-93066867	863	0.632378	226	71	Yes
TCONS_00120830	u	-	XLOC_012556	-	TSS30555	chr15:100303828-100351356	560	0.862608	269	113	Yes
TCONS_00122046	u	-	XLOC_012685	-	TSS30879	chr15:20449020-20634788	358	1.30593	270	159	Yes
TCONS_00122477	u	-	XLOC_012766	-	TSS31088	chr15:39191850-39693264	5796	0.706923	273	70	Yes
TCONS_00123182	u	-	XLOC_012877	-	TSS31376	chr15:74238381-74589664	6708	0.83715	269	103	Yes
TCONS_00124191	u	-	XLOC_013021	-	TSS31806	chr15:81583935-81585248	1313	0.816813	282	76	Yes
TCONS_00124880	u	-	XLOC_013128	-	TSS32118	chr15:90714019-91049963	1425	2.76207	282	200	No
TCONS_00125317	u	-	XLOC_013181	-	TSS32314	chr15:98571003-98610415	1307	1.41397	282	227	Yes
TCONS_00125948	u	-	XLOC_013306	-	TSS32594	chr15:9228909-9230490	1581	0.476084	228	68	No
TCONS_00125970	u	-	XLOC_013328	-	TSS32616	chr15:28058581-28058919	338	0.527345	162	59	No
TCONS_00126014	u	-	XLOC_013372	-	TSS32660	chr15:41446047-41447387	1340	0.820996	282	68	Yes
TCONS_00126027	u	-	XLOC_013382	-	TSS32673	chr15:52258978-52259515	537	0.585893	240	50	No
TCONS_00126036	u	-	XLOC_013391	-	TSS32682	chr15:59210897-59211209	312	0.842896	191	102	No
TCONS_00126048	u	-	XLOC_013403	-	TSS32694	chr15:68876691-68877497	806	0.556044	188	70	No
TCONS_00126094	u	-	XLOC_013449	-	TSS32740	chr15:80130849-80228572	699	1.05989	279	134	Yes
TCONS_00126098	u	-	XLOC_013453	-	TSS32744	chr15:81972235-81972904	669	1.94364	271	201	No
TCONS_00126123	u	-	XLOC_013478	-	TSS32769	chr15:87542929-88040746	3571	0.862351	282	69	Yes
TCONS_00126150	u	-	XLOC_013505	-	TSS32796	chr15:97962966-97964146	1180	0.704658	280	50	Yes
TCONS_00126291	u	-	XLOC_013549	-	TSS32859	chr16:4581940-4719507	4353	0.674263	264	63	Yes
TCONS_00126682	u	-	XLOC_013566	-	TSS32924	chr16:5884558-6254593	1973	2.37469	263	254	Yes
TCONS_00126683	u	-	XLOC_013566	-	TSS32924	chr16:5884558-6254593	1973	2.53953	280	262	Yes
TCONS_00126700	u	-	XLOC_013568	-	TSS32931	chr16:6348314-6767980	544	0.617171	205	73	Yes
TCONS_00126715	u	-	XLOC_013568	-	TSS32933	chr16:6348314-6767980	432	3.63705	254	190	Yes
TCONS_00126716	u	-	XLOC_013568	-	TSS32933	chr16:6348314-6767980	428	3.49748	240	193	Yes
TCONS_00127843	u	-	XLOC_013647	-	TSS33187	chr16:17734233-17735327	1024	1.00856	112	68	No
TCONS_00128601	u	-	XLOC_013693	-	TSS33342	chr16:21330383-21333756	1229	0.756853	282	98	Yes
TCONS_00128602	u	-	XLOC_013693	-	TSS33343	chr16:21330383-21333756	2237	2.266	282	281	Yes
TCONS_00129745	u	-	XLOC_013758	-	TSS33539	chr16:32408425-32411182	2493	3.09131	277	148	No
TCONS_00131588	u	-	XLOC_013836	-	TSS33770	chr16:39856853-40276932	679	4.2734	279	277	Yes
TCONS_00131597	u	-	XLOC_013836	-	TSS33772	chr16:39856853-40276932	569	11.153	281	281	Yes
TCONS_00132828	u	-	XLOC_013934	-	TSS34018	chr16:72027442-72362171	623	1.65699	282	174	Yes
TCONS_00132829	u	-	XLOC_013934	-	TSS34018	chr16:72027442-72362171	734	1.59108	282	188	Yes
TCONS_00137237	u	-	XLOC_014494	-	TSS35491	chr16:74923939-75093303	1029	1.10087	276	164	Yes
TCONS_00137966	u	-	XLOC_014639	-	TSS35864	chr16:15452001-15452289	288	0.91333	165	104	No
TCONS_00138154	u	-	XLOC_014824	-	TSS36052	chr16:51363648-51363904	256	0.990164	175	127	Yes
TCONS_00138199	u	-	XLOC_014869	-	TSS36097	chr16:79914442-79914597	155	3.38883	118	118	Yes
TCONS_00138224	u	-	XLOC_014894	-	TSS36122	chr16:93135061-93135674	613	3.38334	189	167	No
TCONS_00139337	u	-	XLOC_014968	-	TSS36350	chr17:13168534-13465132	3578	1.09046	229	160	No
TCONS_00140132	u	-	XLOC_015038	-	TSS36527	chr17:21423183-21692542	543	1.26441	256	170	Yes
TCONS_00146720	u	-	XLOC_015495	-	TSS37871	chr17:53701806-53758193	568	0.887869	166	129	No
TCONS_00147084	u	-	XLOC_015516	-	TSS37949	chr17:56607451-56611138	1109	1.43353	282	197	Yes
TCONS_00147829	u	-	XLOC_015548	-	TSS38044	chr17:65848420-65913071	305	0.694192	186	85	No
TCONS_00147965	u	-	XLOC_015561	-	TSS38064	chr17:69075681-69096798	347	9.5747	282	278	Yes
TCONS_00149532	u	-	XLOC_015623	-	TSS38247	chr17:81081795-81738329	7153	3.29949	279	187	Yes
TCONS_00149533	u	-	XLOC_015623	-	TSS38247	chr17:81081795-81738329	7124	5.04658	281	228	Yes
TCONS_00150600	u	-	XLOC_015684	-	TSS38394	chr17:3096014-3559820	1699	1.82908	282	260	Yes
TCONS_00151171	u	-	XLOC_015806	-	TSS38704	chr17:21926083-22314834	3084	0.761078	274	78	Yes
TCONS_00153599	u	-	XLOC_016146	-	TSS39740	chr17:37712128-38007380	1827	1.31052	282	123	No
TCONS_00154323	u	-	XLOC_016212	-	TSS39958	chr17:46439379-46890477	1845	0.780494	282	58	Yes
TCONS_00155192	u	-	XLOC_016342	-	TSS40316	chr17:69075681-69096798	295	10.1828	282	252	Yes
TCONS_00155344	u	-	XLOC_016367	-	TSS40392	chr17:73258949-73272165	6226	0.608955	266	59	Yes
TCONS_00155847	u	-	XLOC_016428	-	TSS40567	chr17:86155571-86167517	2568	0.805344	281	86	Yes
TCONS_00156101	u	-	XLOC_016532	-	TSS40727	chr17:25326583-25327022	439	0.921509	199	57	No
TCONS_00156131	u	-	XLOC_016562	-	TSS40757	chr17:32794617-32830243	415	0.661954	219	70	Yes
TCONS_00156142	u	-	XLOC_016573	-	TSS40768	chr17:35303829-35304272	443	2.36123	156	133	No
TCONS_00156143	u	-	XLOC_016574	-	TSS40769	chr17:35304840-35305606	766	0.735556	166	104	No
TCONS_00156167	u	-	XLOC_016598	-	TSS40793	chr17:45549695-45550699	1004	0.98999	282	120	Yes
TCONS_00157361	u	-	XLOC_016749	-	TSS41072	chr18:23309917-23671297	784	2.58881	280	271	Yes
TCONS_00157362	u	-	XLOC_016749	-	TSS41072	chr18:23309917-23671297	366	0.90668	147	87	Yes
TCONS_00160760	u	-	XLOC_016922	-	TSS41583	chr18:53861990-54222690	1574	0.721815	278	62	Yes
TCONS_00160761	u	-	XLOC_016922	-	TSS41584	chr18:53861990-54222690	290	2.54627	205	181	Yes
TCONS_00162061	u	-	XLOC_016988	-	TSS41740	chr18:63544473-63545204	731	1.9436	252	189	No
TCONS_00166851	u	-	XLOC_017536	-	TSS43221	chr18:8051263-8051540	277	0.442004	117	50	No
TCONS_00166852	u	-	XLOC_017537	-	TSS43222	chr18:8137321-8137513	192	2.14405	161	161	No
TCONS_00166859	u	-	XLOC_017544	-	TSS43229	chr18:20548166-20548425	259	0.770459	133	88	No
TCONS_00166894	u	-	XLOC_017578	-	TSS43264	chr18:33383882-33385013	1131	0.99478	214	164	No
TCONS_00166900	u	-	XLOC_017584	-	TSS43270	chr18:34932074-35255390	446	0.749353	196	91	No
TCONS_00166903	u	-	XLOC_017587	-	TSS43273	chr18:36206707-36206920	213	0.888381	113	106	No
TCONS_00166999	u	-	XLOC_017683	-	TSS43369	chr18:75767082-75767433	351	0.760362	204	84	Yes
TCONS_00167022	u	-	XLOC_017706	-	TSS43392	chr18:85140071-85141278	1207	0.643695	190	99	No
TCONS_00167028	u	-	XLOC_017712	-	TSS43398	chr18:90310804-90312375	1571	0.796112	240	95	No
TCONS_00167029	u	-	XLOC_017713	-	TSS43399	chr18:90342494-90342861	367	0.630606	205	58	No
TCONS_00178527	u	-	XLOC_018570	-	TSS45694	chr19:41828431-41833380	4949	2.343	282	282	Yes
TCONS_00178972	u	-	XLOC_018633	-	TSS45877	chr19:46499808-46517060	1527	0.77515	244	105	Yes
TCONS_00179463	u	-	XLOC_018717	-	TSS46091	chr19:3205785-3206308	523	0.831114	248	94	No
TCONS_00179477	u	-	XLOC_018731	-	TSS46105	chr19:6043026-6046423	3397	1.10933	282	200	Yes
TCONS_00179486	u	-	XLOC_018740	-	TSS46114	chr19:11876542-11878981	2439	0.580504	280	80	No
TCONS_00179506	u	-	XLOC_018760	-	TSS46134	chr19:21937300-21938584	1284	2.99879	282	239	No
TCONS_00182535	u	-	XLOC_019135	-	TSS46892	chr2:27442056-27444597	2255	3.12627	282	282	Yes
TCONS_00182536	u	-	XLOC_019135	-	TSS46892	chr2:27442056-27444597	2349	0.662624	268	79	Yes
TCONS_00182538	u	-	XLOC_019135	-	TSS46893	chr2:27442056-27444597	1852	6.69394	282	282	Yes
TCONS_00190804	u	-	XLOC_019682	-	TSS48487	chr2:104721783-104853027	2109	0.534509	182	60	Yes
TCONS_00190810	u	-	XLOC_019682	-	TSS48487	chr2:104721783-104853027	2298	1.1574	256	158	Yes
TCONS_00196359	u	-	XLOC_020023	-	TSS49524	chr2:151373948-151375433	1485	1.06026	264	155	No
TCONS_00198656	u	-	XLOC_020163	-	TSS49932	chr2:161109339-161115316	456	0.559359	174	69	Yes
TCONS_00199957	u	-	XLOC_020268	-	TSS50212	chr2:168630108-168634366	4258	1.06385	282	157	Yes
TCONS_00200562	u	-	XLOC_020311	-	TSS50295	chr2:173859182-174047381	1391	7.02593	282	282	Yes
TCONS_00202113	u	-	XLOC_020452	-	TSS50767	chr2:11408843-11434539	1345	3.30334	273	190	No
TCONS_00204373	u	-	XLOC_020718	-	TSS51755	chr2:43518268-43551057	1158	1.28141	250	175	Yes
TCONS_00205878	u	-	XLOC_020972	-	TSS52433	chr2:87526012-87526986	884	8.15458	278	126	No
TCONS_00208364	u	-	XLOC_021430	-	TSS53588	chr2:134762056-134763647	1500	0.857624	225	56	No
TCONS_00208365	u	-	XLOC_021430	-	TSS53588	chr2:134762056-134763647	1441	1.17709	196	62	No
TCONS_00209592	u	-	XLOC_021655	-	TSS54150	chr2:162982370-162983278	908	0.843336	229	114	Yes
TCONS_00210847	u	-	XLOC_021878	-	TSS54751	chr2:17940128-17941271	1143	1.31325	179	151	No
TCONS_00210861	u	-	XLOC_021892	-	TSS54765	chr2:24179627-24180104	477	1.0905	192	144	No
TCONS_00210862	u	-	XLOC_021893	-	TSS54766	chr2:24182791-24184836	2045	0.675819	230	76	No
TCONS_00210864	u	-	XLOC_021895	-	TSS54768	chr2:25365923-25366337	414	1.77018	222	152	No
TCONS_00210878	u	-	XLOC_021909	-	TSS54782	chr2:32853562-32854077	515	0.686228	243	57	Yes
TCONS_00210892	u	-	XLOC_021923	-	TSS54796	chr2:53191442-53191611	169	4.21088	194	194	No
TCONS_00210932	u	-	XLOC_021963	-	TSS54836	chr2:83353061-83353972	911	0.92418	279	69	No
TCONS_00210985	u	-	XLOC_022016	-	TSS54889	chr2:122466451-122467966	1515	1.49881	282	246	Yes
TCONS_00211014	u	-	XLOC_022045	-	TSS54918	chr2:140072992-140073448	456	0.957551	234	95	No
TCONS_00211034	u	-	XLOC_022065	-	TSS54938	chr2:149356930-149357695	765	0.418721	135	59	No
TCONS_00211047	u	-	XLOC_022078	-	TSS54951	chr2:152185243-152185700	457	2.77541	274	229	No
TCONS_00211066	u	-	XLOC_022097	-	TSS54970	chr2:157528311-157528976	665	3.44592	243	161	No
TCONS_00211121	u	-	XLOC_022152	-	TSS55025	chr2:179177241-179178913	1672	1.53426	279	165	No
TCONS_00213637	u	-	XLOC_022312	-	TSS55468	chr3:45142979-45434566	10384	1.1079	282	212	Yes
TCONS_00214232	u	-	XLOC_022357	-	TSS55564	chr3:56698379-56742525	284	2.3113	260	217	Yes
TCONS_00214414	u	-	XLOC_022383	-	TSS55617	chr3:61394883-61462921	1255	1.15789	267	170	Yes
TCONS_00225649	u	-	XLOC_022982	-	TSS57345	chr3:6138569-6139043	396	0.950689	246	114	No
TCONS_00225808	u	-	XLOC_023023	-	TSS57425	chr3:18052398-18057512	1429	1.40005	282	236	Yes
TCONS_00226463	u	-	XLOC_023137	-	TSS57710	chr3:52268336-52614016	1238	0.385033	146	64	Yes
TCONS_00226755	u	-	XLOC_023204	-	TSS57861	chr3:65393275-65396405	3130	0.515544	266	54	No
TCONS_00227462	u	-	XLOC_023299	-	TSS58155	chr3:87858899-88058769	2415	1.00492	235	130	Yes
TCONS_00228082	u	-	XLOC_023425	-	TSS58453	chr3:94612465-94787748	185	1.48063	101	101	No
TCONS_00230557	u	-	XLOC_023827	-	TSS59525	chr3:8246186-8246573	387	0.684122	201	60	Yes
TCONS_00230668	u	-	XLOC_023938	-	TSS59636	chr3:67850724-67851248	524	0.617891	183	77	No
TCONS_00230671	u	-	XLOC_023941	-	TSS59639	chr3:69963278-69965336	2058	1.2274	250	94	No
TCONS_00230765	u	-	XLOC_024035	-	TSS59733	chr3:122984723-122985011	288	0.569174	150	56	No
TCONS_00230774	u	-	XLOC_024044	-	TSS59742	chr3:129462437-129462802	365	0.851724	210	98	No
TCONS_00230775	u	-	XLOC_024045	-	TSS59743	chr3:129504984-129505774	790	2.01165	151	146	No
TCONS_00230779	u	-	XLOC_024049	-	TSS59747	chr3:130929035-130930538	1503	1.95046	267	136	No
TCONS_00232605	u	-	XLOC_024187	-	TSS60060	chr4:32951095-32965363	732	9.3758	235	87	No
TCONS_00235841	u	-	XLOC_024435	-	TSS60671	chr4:69891680-70017310	270	132.805	161	106	No
TCONS_00235997	u	-	XLOC_024452	-	TSS60699	chr4:79710900-80202419	766	15.3982	223	223	Yes
TCONS_00235998	u	-	XLOC_024452	-	TSS60700	chr4:79710900-80202419	1797	458.239	282	282	Yes
TCONS_00235999	u	-	XLOC_024452	-	TSS60701	chr4:79710900-80202419	2798	7.64467	274	80	Yes
TCONS_00236070	u	-	XLOC_024464	-	TSS60722	chr4:83181350-83195206	651	0.986854	262	129	Yes
TCONS_00236115	u	-	XLOC_024469	-	TSS60734	chr4:84104904-84106114	1210	1.67157	279	175	Yes
TCONS_00241327	u	-	XLOC_024807	-	TSS61775	chr4:126984374-126985205	831	2.11156	233	78	No
TCONS_00242438	u	-	XLOC_024873	-	TSS61999	chr4:132183526-132212359	1245	0.629352	257	51	Yes
TCONS_00244782	u	-	XLOC_025015	-	TSS62442	chr4:141545392-141548321	2929	1.11791	282	186	Yes
TCONS_00247156	u	-	XLOC_025285	-	TSS63146	chr4:21926424-22196656	1517	0.559661	241	67	Yes
TCONS_00248806	u	-	XLOC_025575	-	TSS63890	chr4:69891680-70017310	847	13.1429	282	280	No
TCONS_00248939	u	-	XLOC_025600	-	TSS63954	chr4:79710900-80202419	506	134.325	245	232	Yes
TCONS_00248942	u	-	XLOC_025600	-	TSS63954	chr4:79710900-80202419	1477	1.21784	138	111	Yes
TCONS_00248943	u	-	XLOC_025600	-	TSS63954	chr4:79710900-80202419	1572	446.844	282	282	Yes
TCONS_00248944	u	-	XLOC_025600	-	TSS63955	chr4:79710900-80202419	354	2046.12	282	282	Yes
TCONS_00248945	u	-	XLOC_025600	-	TSS63954	chr4:79710900-80202419	474	3.60333	203	183	Yes
TCONS_00248946	u	-	XLOC_025600	-	TSS63954	chr4:79710900-80202419	479	3.69394	200	187	Yes
TCONS_00248949	u	-	XLOC_025600	-	TSS63956	chr4:79710900-80202419	2027	296.05	281	279	Yes
TCONS_00249222	u	-	XLOC_025637	-	TSS64063	chr4:88598970-88599892	869	4.31381	272	162	No
TCONS_00249317	u	-	XLOC_025664	-	TSS64111	chr4:92807779-92829931	325	4.94085	194	169	No
TCONS_00250673	u	-	XLOC_025889	-	TSS64785	chr4:121712423-122303270	687	42.0811	282	281	No
TCONS_00250674	u	-	XLOC_025889	-	TSS64785	chr4:121712423-122303270	1248	5.8091	282	224	No
TCONS_00251308	u	-	XLOC_025988	-	TSS65078	chr4:129884186-129884847	661	1.06546	279	151	Yes
TCONS_00252593	u	-	XLOC_026181	-	TSS65672	chr4:142579870-143074771	1272	0.72159	278	66	Yes
TCONS_00252872	u	-	XLOC_026241	-	TSS65789	chr4:148202034-148214794	289	0.957829	150	83	Yes
TCONS_00253799	u	-	XLOC_026347	-	TSS66178	chr4:10438360-10439143	783	0.559573	130	80	No
TCONS_00253821	u	-	XLOC_026369	-	TSS66200	chr4:27867150-27867745	595	1.01313	276	132	No
TCONS_00253824	u	-	XLOC_026372	-	TSS66203	chr4:34353824-34355004	1180	2.10292	282	204	No
TCONS_00253863	u	-	XLOC_026411	-	TSS66242	chr4:53713635-53806465	350	2.085	105	91	No
TCONS_00253954	u	-	XLOC_026502	-	TSS66333	chr4:127140992-127141513	521	1.0733	124	81	No
TCONS_00254040	u	-	XLOC_026587	-	TSS66419	chr4:143672723-143673606	883	0.67089	205	73	No
TCONS_00254061	u	-	XLOC_026608	-	TSS66440	chr4:152156069-152157442	1373	0.577211	148	79	No
TCONS_00254705	u	-	XLOC_026670	-	TSS66569	chr5:12904082-13043508	1267	0.950748	249	126	No
TCONS_00255517	u	-	XLOC_026701	-	TSS66638	chr5:22550436-23275739	2708	0.999436	242	126	Yes
TCONS_00255530	u	-	XLOC_026701	-	TSS66641	chr5:22550436-23275739	2708	1.01684	241	127	Yes
TCONS_00255531	u	-	XLOC_026701	-	TSS66642	chr5:22550436-23275739	2725	1.53083	252	192	Yes
TCONS_00255532	u	-	XLOC_026701	-	TSS66643	chr5:22550436-23275739	2674	2.9588	278	238	Yes
TCONS_00255533	u	-	XLOC_026701	-	TSS66643	chr5:22550436-23275739	2674	1.23309	267	168	Yes
TCONS_00255535	u	-	XLOC_026701	-	TSS66643	chr5:22550436-23275739	2722	3.24215	278	254	Yes
TCONS_00255537	u	-	XLOC_026701	-	TSS66644	chr5:22550436-23275739	2722	3.23187	278	254	Yes
TCONS_00255538	u	-	XLOC_026701	-	TSS66644	chr5:22550436-23275739	2674	1.2355	267	168	Yes
TCONS_00255540	u	-	XLOC_026701	-	TSS66645	chr5:22550436-23275739	2687	0.759385	165	99	Yes
TCONS_00255551	u	-	XLOC_026701	-	TSS66648	chr5:22550436-23275739	2708	1.03101	241	127	Yes
TCONS_00255560	u	-	XLOC_026701	-	TSS66652	chr5:22550436-23275739	2725	1.54039	251	192	Yes
TCONS_00255561	u	-	XLOC_026701	-	TSS66653	chr5:22550436-23275739	2670	1.50287	234	172	Yes
TCONS_00255897	u	-	XLOC_026720	-	TSS66707	chr5:24583041-24624765	19675	0.521094	254	51	Yes
TCONS_00258607	u	-	XLOC_026837	-	TSS67122	chr5:37024058-37239138	9992	0.829788	236	101	Yes
TCONS_00258881	u	-	XLOC_026862	-	TSS67189	chr5:43943938-43944372	434	0.566941	122	64	No
TCONS_00258889	u	-	XLOC_026866	-	TSS67193	chr5:44175143-44243573	2151	1.93291	282	263	Yes
TCONS_00261735	u	-	XLOC_027032	-	TSS67661	chr5:90132192-90133106	914	1.14252	232	96	No
TCONS_00263274	u	-	XLOC_027154	-	TSS67913	chr5:104451461-104600171	2899	1.06547	272	102	Yes
TCONS_00264657	u	-	XLOC_027222	-	TSS68135	chr5:111580796-111840001	6181	1.05124	282	105	Yes
TCONS_00264658	u	-	XLOC_027223	-	TSS68136	chr5:111580796-111840001	1204	0.83438	278	91	Yes
TCONS_00271405	u	-	XLOC_027551	-	TSS69143	chr5:143281275-143293729	531	0.822531	258	87	Yes
TCONS_00272790	u	-	XLOC_027623	-	TSS69366	chr5:150118656-150498028	168	2.65907	135	135	Yes
TCONS_00272887	u	-	XLOC_027629	-	TSS69384	chr5:3021049-3236958	475	42.7824	279	141	No
TCONS_00272888	u	-	XLOC_027629	-	TSS69384	chr5:3021049-3236958	355	21.192	276	223	No
TCONS_00274682	u	-	XLOC_027901	-	TSS70175	chr5:51803440-52116612	822	1.17151	248	133	Yes
TCONS_00274687	u	-	XLOC_027901	-	TSS70178	chr5:51803440-52116612	630	0.841709	243	102	Yes
TCONS_00275324	u	-	XLOC_028018	-	TSS70469	chr5:79638058-79638518	370	4.15603	280	277	Yes
TCONS_00275627	u	-	XLOC_028088	-	TSS70616	chr5:93003670-93004503	833	1.49629	240	187	No
TCONS_00276423	u	-	XLOC_028194	-	TSS70930	chr5:109866543-109945870	3531	1.81226	282	276	Yes
TCONS_00277066	u	-	XLOC_028289	-	TSS71220	chr5:117355264-117389047	1446	0.649848	249	76	Yes
TCONS_00279624	u	-	XLOC_028681	-	TSS72338	chr5:33994906-33995752	846	3.13061	282	280	Yes
TCONS_00279647	u	-	XLOC_028703	-	TSS72361	chr5:38507566-38507782	216	3.04639	194	190	No
TCONS_00279690	u	-	XLOC_028746	-	TSS72404	chr5:73978559-73979250	691	0.720086	176	101	No
TCONS_00279693	u	-	XLOC_028749	-	TSS72407	chr5:76655281-76656376	1095	1.13586	282	160	Yes
TCONS_00279721	u	-	XLOC_028777	-	TSS72435	chr5:101520124-101520464	340	3.21304	159	144	No
TCONS_00279729	u	-	XLOC_028785	-	TSS72443	chr5:104802082-104916578	241	1.06053	135	118	No
TCONS_00279754	u	-	XLOC_028810	-	TSS72468	chr5:117058857-117059850	993	0.747576	154	93	No
TCONS_00279813	u	-	XLOC_028869	-	TSS72527	chr5:149660640-149661288	648	0.696927	232	78	No
TCONS_00279886	u	-	XLOC_028882	-	TSS72548	chr6:3795265-3807445	484	0.590613	242	53	Yes
TCONS_00280844	u	-	XLOC_028953	-	TSS72748	chr6:22511998-22704631	341	3.15558	249	219	No
TCONS_00282250	u	-	XLOC_029050	-	TSS73023	chr6:37644675-37807101	1132	80.5264	282	282	No
TCONS_00285482	u	-	XLOC_029336	-	TSS73658	chr6:70990273-71125022	445	1.70063	245	112	No
TCONS_00288192	u	-	XLOC_029483	-	TSS74071	chr6:91428805-91430080	1275	1.86986	272	189	Yes
TCONS_00288194	u	-	XLOC_029484	-	TSS74072	chr6:91440876-91441829	636	0.527462	262	50	Yes
TCONS_00288778	u	-	XLOC_029506	-	TSS74144	chr6:97151587-97179769	3593	2.02609	282	260	Yes
TCONS_00290403	u	-	XLOC_029605	-	TSS74426	chr6:118460163-119112004	1944	0.997349	266	136	Yes
TCONS_00292092	u	-	XLOC_029709	-	TSS74714	chr6:128169072-128200642	2868	1.07094	274	144	Yes
TCONS_00293944	u	-	XLOC_029898	-	TSS75185	chr6:9889895-9890180	285	63.0531	282	282	No
TCONS_00298433	u	-	XLOC_030723	-	TSS77197	chr6:136485349-136487357	2008	0.65749	241	78	No
TCONS_00298989	u	-	XLOC_030830	-	TSS77449	chr6:18144825-18145357	532	1.01033	215	123	No
TCONS_00299020	u	-	XLOC_030860	-	TSS77480	chr6:40782335-40782678	343	1.1718	221	130	No
TCONS_00299023	u	-	XLOC_030863	-	TSS77483	chr6:45058858-45059509	651	0.908619	277	109	Yes
TCONS_00299026	u	-	XLOC_030866	-	TSS77486	chr6:47757626-47757820	194	1.18218	112	112	No
TCONS_00299036	u	-	XLOC_030875	-	TSS77496	chr6:52142461-52142980	519	0.608725	101	82	No
TCONS_00299040	u	-	XLOC_030879	-	TSS77500	chr6:57535891-57536743	852	1.17843	279	167	Yes
TCONS_00299047	u	-	XLOC_030886	-	TSS77507	chr6:66284482-66284775	293	0.644383	140	76	No
TCONS_00299052	u	-	XLOC_030891	-	TSS77512	chr6:67882614-67883535	921	0.535102	128	67	No
TCONS_00299067	u	-	XLOC_030906	-	TSS77527	chr6:85808023-85851295	1734	4.00792	282	282	No
TCONS_00299084	u	-	XLOC_030922	-	TSS77544	chr6:89200698-89201309	611	0.687893	264	50	No
TCONS_00299112	u	-	XLOC_030950	-	TSS77572	chr6:102936164-102936355	191	3.08743	202	202	No
TCONS_00299147	u	-	XLOC_030985	-	TSS77607	chr6:118011334-118091667	387	0.776859	215	96	Yes
TCONS_00299148	u	-	XLOC_030986	-	TSS77608	chr6:118011334-118091667	3535	0.696496	282	51	Yes
TCONS_00299157	u	-	XLOC_030995	-	TSS77617	chr6:123693287-123693993	706	2.23011	276	168	No
TCONS_00299169	u	-	XLOC_031007	-	TSS77629	chr6:128531034-128531461	427	0.649061	186	70	No
TCONS_00299170	u	-	XLOC_031008	-	TSS77630	chr6:128798586-128799180	594	0.700602	260	60	Yes
TCONS_00299171	u	-	XLOC_031009	-	TSS77631	chr6:128839059-128839284	225	1.08913	153	137	No
TCONS_00299196	u	-	XLOC_031034	-	TSS77656	chr6:138187046-138187575	529	18.4805	282	277	No
TCONS_00300474	u	-	XLOC_031169	-	TSS77989	chr7:15969037-16096338	859	2.74378	277	273	Yes
TCONS_00301003	u	-	XLOC_031190	-	TSS78087	chr7:16934417-16988549	5708	9.71349	281	275	Yes
TCONS_00301004	u	-	XLOC_031190	-	TSS78088	chr7:16934417-16988549	4814	4.17843	193	183	Yes
TCONS_00301005	u	-	XLOC_031190	-	TSS78088	chr7:16934417-16988549	4370	4.75904	271	243	Yes
TCONS_00303558	u	-	XLOC_031397	-	TSS78676	chr7:29908105-29917104	5355	0.884639	263	123	Yes
TCONS_00303563	u	-	XLOC_031397	-	TSS78676	chr7:29908105-29917104	3412	0.434537	193	51	Yes
TCONS_00303570	u	-	XLOC_031397	-	TSS78679	chr7:29908105-29917104	5021	0.44439	249	56	Yes
TCONS_00303573	u	-	XLOC_031397	-	TSS78679	chr7:29908105-29917104	3087	1.82525	273	223	Yes
TCONS_00303586	u	-	XLOC_031400	-	TSS78683	chr7:29956133-29970220	2220	0.443885	238	60	Yes
TCONS_00305906	u	-	XLOC_031619	-	TSS79259	chr7:47008478-47009618	1010	0.800401	279	74	Yes
TCONS_00306826	u	-	XLOC_031659	-	TSS79389	chr7:60902602-61311773	4660	0.53566	111	56	Yes
TCONS_00306827	u	-	XLOC_031659	-	TSS79390	chr7:60902602-61311773	15378	0.862845	282	111	Yes
TCONS_00306831	u	-	XLOC_031661	-	TSS79393	chr7:61520859-61595779	422	1.11056	261	146	Yes
TCONS_00309312	u	-	XLOC_031808	-	TSS79836	chr7:90422658-91033934	642	0.968669	222	118	Yes
TCONS_00309316	u	-	XLOC_031808	-	TSS79838	chr7:90422658-91033934	810	0.676913	254	72	Yes
TCONS_00309517	u	-	XLOC_031818	-	TSS79872	chr7:94706215-95738424	224	0.961201	143	79	Yes
TCONS_00310312	u	-	XLOC_031845	-	TSS79948	chr7:98584950-98658262	1168	1.09987	274	150	Yes
TCONS_00313334	u	-	XLOC_032057	-	TSS80428	chr7:118592292-118596837	520	0.674354	211	78	Yes
TCONS_00313488	u	-	XLOC_032069	-	TSS80469	chr7:119730420-119745671	14139	0.798725	282	86	No
TCONS_00313490	u	-	XLOC_032069	-	TSS80469	chr7:119730420-119745671	12164	0.78498	281	71	No
TCONS_00313494	u	-	XLOC_032069	-	TSS80469	chr7:119730420-119745671	14111	0.443632	265	60	No
TCONS_00313498	u	-	XLOC_032069	-	TSS80469	chr7:119730420-119745671	13497	0.517136	159	61	No
TCONS_00313502	u	-	XLOC_032069	-	TSS80469	chr7:119730420-119745671	14125	0.463742	280	54	No
TCONS_00313505	u	-	XLOC_032069	-	TSS80470	chr7:119730420-119745671	8650	1.16782	277	120	No
TCONS_00313508	u	-	XLOC_032069	-	TSS80471	chr7:119730420-119745671	3696	1.00774	125	95	No
TCONS_00313509	u	-	XLOC_032069	-	TSS80471	chr7:119730420-119745671	3438	0.511056	184	56	No
TCONS_00313510	u	-	XLOC_032069	-	TSS80471	chr7:119730420-119745671	3487	0.60594	178	63	No
TCONS_00315308	u	-	XLOC_032171	-	TSS80867	chr7:128329839-128341208	856	0.761039	233	97	No
TCONS_00317769	u	-	XLOC_032325	-	TSS81324	chr7:3028123-3182080	906	8.57197	274	185	No
TCONS_00318572	u	-	XLOC_032495	-	TSS81735	chr7:16934417-16988549	5403	9.73051	282	279	Yes
TCONS_00319782	u	-	XLOC_032727	-	TSS82282	chr7:29908105-29917104	4985	0.453975	199	63	Yes
TCONS_00321716	u	-	XLOC_033186	-	TSS83301	chr7:60902602-61311773	6122	0.585666	200	68	Yes
TCONS_00321717	u	-	XLOC_033186	-	TSS83301	chr7:60902602-61311773	6208	2.81895	280	246	Yes
TCONS_00321719	u	-	XLOC_033186	-	TSS83303	chr7:60902602-61311773	10178	0.717519	213	97	Yes
TCONS_00321749	u	-	XLOC_033188	-	TSS83311	chr7:61520859-61595779	122	36.1993	231	230	Yes
TCONS_00322336	u	-	XLOC_033271	-	TSS83571	chr7:79586614-79593004	1063	0.970751	280	118	Yes
TCONS_00322915	u	-	XLOC_033351	-	TSS83781	chr7:89133204-89608890	1221	0.708392	254	79	No
TCONS_00322976	u	-	XLOC_033368	-	TSS83814	chr7:91090705-92449420	1968	18.8887	282	282	Yes
TCONS_00323499	u	-	XLOC_033446	-	TSS84037	chr7:102119283-102239048	3291	0.85117	273	79	Yes
TCONS_00323599	u	-	XLOC_033499	-	TSS84103	chr7:103882562-103883138	576	4.4302	282	281	No
TCONS_00323838	u	-	XLOC_033575	-	TSS84229	chr7:107567363-107592806	925	2.54045	266	205	Yes
TCONS_00326408	u	-	XLOC_033951	-	TSS85262	chr7:14304702-14305027	325	0.933357	226	118	Yes
TCONS_00326424	u	-	XLOC_033967	-	TSS85278	chr7:27304999-27339975	1659	0.909844	282	97	Yes
TCONS_00326474	u	-	XLOC_034017	-	TSS85328	chr7:59150846-59346935	5934	0.87297	282	74	Yes
TCONS_00326495	u	-	XLOC_034037	-	TSS85349	chr7:60902602-61311773	3090	0.822245	282	53	Yes
TCONS_00326497	u	-	XLOC_034039	-	TSS85351	chr7:60902602-61311773	803	1.39299	274	197	Yes
TCONS_00326502	u	-	XLOC_034044	-	TSS85356	chr7:61520859-61595779	797	0.724306	276	66	Yes
TCONS_00326514	u	-	XLOC_034056	-	TSS85368	chr7:61687448-62381645	1288	0.850376	281	106	Yes
TCONS_00326515	u	-	XLOC_034057	-	TSS85369	chr7:61687448-62381645	319	2.83486	231	225	Yes
TCONS_00326608	u	-	XLOC_034147	-	TSS85462	chr7:111797509-111797602	93	2931.48	282	282	Yes
TCONS_00326619	u	-	XLOC_034158	-	TSS85473	chr7:116546635-116549304	2669	1.8416	282	280	Yes
TCONS_00326649	u	-	XLOC_034188	-	TSS85503	chr7:136810825-136812657	1832	0.48981	221	79	No
TCONS_00326656	u	-	XLOC_034195	-	TSS85510	chr7:140315750-140316085	335	0.576222	135	70	No
TCONS_00328125	u	-	XLOC_034323	-	TSS85856	chr8:19700835-20035357	7331	0.628594	282	76	No
TCONS_00328146	u	-	XLOC_034326	-	TSS85870	chr8:19700835-20035357	478	2.18386	277	225	No
TCONS_00328158	u	-	XLOC_034331	-	TSS85876	chr8:20122240-20124090	1021	1.32071	280	197	No
TCONS_00329322	u	-	XLOC_034423	-	TSS86069	chr8:29286167-29291958	756	14.3105	280	206	No
TCONS_00334751	u	-	XLOC_034776	-	TSS87050	chr8:90813578-91057320	518	7.18781	282	282	Yes
TCONS_00339535	u	-	XLOC_035035	-	TSS87773	chr8:122882586-123051084	6450	2.09606	282	281	Yes
TCONS_00340625	u	-	XLOC_035075	-	TSS87933	chr8:126135947-126400329	370	0.616302	168	79	Yes
TCONS_00341342	u	-	XLOC_035197	-	TSS88208	chr8:19700835-20035357	7255	1.70885	282	204	Yes
TCONS_00341349	u	-	XLOC_035204	-	TSS88215	chr8:20513683-20528233	352	2.26013	268	224	Yes
TCONS_00343139	u	-	XLOC_035508	-	TSS88987	chr8:75279560-75406619	394	8.1692	163	108	No
TCONS_00343767	u	-	XLOC_035618	-	TSS89278	chr8:90813578-91057320	3425	0.715101	274	72	Yes
TCONS_00344548	u	-	XLOC_035730	-	TSS89619	chr8:107942411-108961828	2978	1.59938	282	269	Yes
TCONS_00344966	u	-	XLOC_035796	-	TSS89782	chr8:117155833-117216168	1813	1.27261	279	204	Yes
TCONS_00345797	u	-	XLOC_035984	-	TSS90177	chr8:20259123-20260000	877	2.14771	282	268	No
TCONS_00345798	u	-	XLOC_035985	-	TSS90178	chr8:20260209-20260499	290	3.15518	277	263	Yes
TCONS_00345799	u	-	XLOC_035986	-	TSS90179	chr8:20262559-20263852	1293	1.27539	282	169	No
TCONS_00345808	u	-	XLOC_035995	-	TSS90188	chr8:28186634-28186962	328	0.60073	166	63	No
TCONS_00345898	u	-	XLOC_036082	-	TSS90278	chr8:74137104-74137323	219	1.72567	188	179	No
TCONS_00345910	u	-	XLOC_036094	-	TSS90290	chr8:80110526-80112069	1543	1.16609	259	163	No
TCONS_00345924	u	-	XLOC_036108	-	TSS90304	chr8:87959660-87961012	1352	2.0195	282	272	Yes
TCONS_00345926	u	-	XLOC_036110	-	TSS90306	chr8:90813578-91057320	485	0.694399	240	71	Yes
TCONS_00345927	u	-	XLOC_036111	-	TSS90307	chr8:91688178-91689110	932	1.20709	281	175	Yes
TCONS_00345936	u	-	XLOC_036120	-	TSS90316	chr8:97876173-97876527	354	0.718422	130	81	No
TCONS_00345940	u	-	XLOC_036124	-	TSS90320	chr8:102535665-102536131	466	4.92644	229	155	No
TCONS_00345956	u	-	XLOC_036139	-	TSS90336	chr8:109315039-109491690	1122	1.37888	280	60	No
TCONS_00350538	u	-	XLOC_036526	-	TSS91184	chr9:45962575-45965209	2634	0.910063	282	89	Yes
TCONS_00352318	u	-	XLOC_036609	-	TSS91419	chr9:57482906-57484871	1965	4.66072	282	145	No
TCONS_00357216	u	-	XLOC_036857	-	TSS92147	chr9:91404316-91774565	185	1.22516	138	108	Yes
TCONS_00362871	u	-	XLOC_037134	-	TSS93010	chr9:123872997-123873125	128	10.5636	124	124	Yes
TCONS_00362911	u	-	XLOC_037143	-	TSS93029	chr9:124438935-124490142	1618	3.83623	282	282	Yes
TCONS_00363758	u	-	XLOC_037288	-	TSS93378	chr9:27299071-27358373	11795	5.55612	282	282	Yes
TCONS_00363819	u	-	XLOC_037298	-	TSS93409	chr9:31278061-31381757	1402	0.746359	236	92	Yes
TCONS_00364232	u	-	XLOC_037391	-	TSS93608	chr9:41328822-41789622	4039	0.611461	229	74	Yes
TCONS_00364516	u	-	XLOC_037430	-	TSS93726	chr9:44596714-44640905	8064	1.13144	279	174	Yes
TCONS_00365733	u	-	XLOC_037599	-	TSS94214	chr9:62270728-62537053	602	0.701814	248	67	No
TCONS_00368449	u	-	XLOC_037998	-	TSS95374	chr9:117706488-118040380	584	0.80257	244	98	Yes
TCONS_00368848	u	-	XLOC_038061	-	TSS95548	chr9:124438935-124490142	760	5.91076	280	274	Yes
TCONS_00368850	u	-	XLOC_038061	-	TSS95548	chr9:124438935-124490142	760	0.433969	109	56	Yes
TCONS_00368851	u	-	XLOC_038061	-	TSS95548	chr9:124438935-124490142	980	0.686183	264	57	Yes
TCONS_00368854	u	-	XLOC_038062	-	TSS95549	chr9:124438935-124490142	2297	0.592095	221	68	Yes
TCONS_00368855	u	-	XLOC_038062	-	TSS95549	chr9:124438935-124490142	2930	1.20072	278	163	Yes
TCONS_00368906	u	-	XLOC_038113	-	TSS95600	chr9:25250865-25252036	1171	2.20733	282	281	Yes
TCONS_00368964	u	-	XLOC_038171	-	TSS95658	chr9:51656932-51657557	625	0.958612	211	119	No
TCONS_00369030	u	-	XLOC_038237	-	TSS95724	chr9:83162237-83162953	716	0.539275	214	59	No
TCONS_00369112	u	-	XLOC_038319	-	TSS95806	chr9:113792772-113793193	421	1.9672	278	246	Yes
TCONS_00370024	u	-	XLOC_038454	-	TSS96061	chrX:12654601-12976747	3424	2.43333	282	282	Yes
TCONS_00372398	u	-	XLOC_038647	-	TSS96507	chrX:59060915-59062035	1120	0.730223	280	50	Yes
TCONS_00373946	u	-	XLOC_038764	-	TSS96790	chrX:82814669-82930161	393	0.774172	275	82	Yes
TCONS_00373947	u	-	XLOC_038764	-	TSS96790	chrX:82814669-82930161	393	0.720426	273	74	Yes
TCONS_00375332	u	-	XLOC_038850	-	TSS97012	chrX:102903085-103312379	2574	1.03415	282	151	Yes
TCONS_00376964	u	-	XLOC_039009	-	TSS97360	chrX:140178697-140435697	2238	0.62286	164	72	Yes
TCONS_00376965	u	-	XLOC_039009	-	TSS97360	chrX:140178697-140435697	2856	0.836551	212	109	Yes
TCONS_00377598	u	-	XLOC_039067	-	TSS97521	chrX:151945291-151946579	1288	1.09835	279	72	Yes
TCONS_00379556	u	-	XLOC_039330	-	TSS98130	chrX:38180031-38181911	1766	1.2711	267	119	No
TCONS_00380968	u	-	XLOC_039581	-	TSS98736	chrX:95960276-95968795	5138	1.61685	281	242	Yes
TCONS_00381032	u	-	XLOC_039594	-	TSS98762	chrX:99820088-99848914	741	0.591206	201	70	Yes
TCONS_00381420	u	-	XLOC_039647	-	TSS98903	chrX:105120356-105391886	5410	1.04979	278	152	Yes
TCONS_00381458	u	-	XLOC_039647	-	TSS98907	chrX:105120356-105391886	14065	0.893782	282	92	Yes
TCONS_00382029	u	-	XLOC_039771	-	TSS99166	chrX:140178697-140435697	4919	1.30659	248	155	Yes
TCONS_00382791	u	-	XLOC_039919	-	TSS99513	chrX:6778250-6778679	429	1.22236	262	175	Yes
TCONS_00382808	u	-	XLOC_039936	-	TSS99530	chrX:19893671-19894135	464	0.508252	180	51	No
TCONS_00382822	u	-	XLOC_039949	-	TSS99544	chrX:29563196-29564269	1073	0.44001	152	67	No
TCONS_00382829	u	-	XLOC_039956	-	TSS99551	chrX:46535814-46536125	311	0.512504	139	53	No
TCONS_00382830	u	-	XLOC_039957	-	TSS99552	chrX:48009858-48010477	619	2.2234	281	272	Yes
TCONS_00382833	u	-	XLOC_039960	-	TSS99555	chrX:53418125-53418967	842	1.94145	281	191	No
TCONS_00382851	u	-	XLOC_039978	-	TSS99573	chrX:74494329-74495001	672	2.46939	281	275	No
TCONS_00382854	u	-	XLOC_039981	-	TSS99576	chrX:81820374-81821745	1371	1.84182	253	105	No
TCONS_00382860	u	-	XLOC_039987	-	TSS99582	chrX:90744667-90744828	161	4.54916	176	176	No
TCONS_00382872	u	-	XLOC_039999	-	TSS99594	chrX:102903085-103312379	1873	1.56625	282	269	Yes
TCONS_00382874	u	-	XLOC_040001	-	TSS99596	chrX:105120356-105391886	5577	1.10738	282	195	Yes
TCONS_00382884	u	-	XLOC_040011	-	TSS99606	chrX:114802898-114803275	377	0.571397	113	71	No
TCONS_00382890	u	-	XLOC_040017	-	TSS99612	chrX:120160977-120161932	955	1.19265	261	167	No
TCONS_00382892	u	-	XLOC_040019	-	TSS99614	chrX:127184464-127184867	403	0.738533	237	78	No
TCONS_00382895	u	-	XLOC_040022	-	TSS99617	chrX:129663308-129664032	724	0.852276	183	122	No
TCONS_00382910	u	-	XLOC_040037	-	TSS99632	chrX:139676049-139676284	235	2.52217	180	173	No
TCONS_00382911	u	-	XLOC_040038	-	TSS99633	chrX:141710997-141987595	227	1.66653	116	114	No
TCONS_00382923	u	-	XLOC_040050	-	TSS99645	chrX:145990804-145991275	471	0.64278	117	74	No
TCONS_00382924	u	-	XLOC_040051	-	TSS99646	chrX:146176672-146177056	384	0.75352	194	82	No
TCONS_00382930	u	-	XLOC_040057	-	TSS99652	chrX:151757904-151758209	305	2.07629	255	207	No
TCONS_00382935	u	-	XLOC_040062	-	TSS99657	chrX:152512303-152512666	363	0.576764	176	61	No
TCONS_00382947	u	-	XLOC_040074	-	TSS99669	chrX:161271708-161271932	224	0.77755	123	109	No
TCONS_00383214	u	-	XLOC_040214	-	TSS99817	chrY:90736674-90740733	2848	0.824757	218	79	Yes
TCONS_00383218	u	-	XLOC_040214	-	TSS99817	chrY:90736674-90740733	2858	0.711148	178	67	Yes

## Sheet: c_sample_description
SRA biosample accession	MouseNum	Strain	File	QTLfile_column	N read pairs fastq	N uniq mapped	N multiloci mapped	Total mapped	N splices	N annotated splices	%_mapped	%_mapped_uniq	%_unannotated splices	File R1	File R2	BAM
SAMN04537026	OB-1301	129X1/SvJ	HypoT129X1zSvJzOBz1301	1	12822240	11645652	410613	12056265	2671653	2621221	94.03	90.82	1.89	Sample_129X1_SvJ-OB-1301_R1.fastq.gz	Sample_129X1_SvJ-OB-1301_R2.fastq.gz	HypoT129X1zSvJzOBz1301_sorted.bam
SAMN04537027	OB-1302	129X1/SvJ	HypoT129X1zSvJzOBz1302	2	12085505	10211912	361897	10573809	2215233	2172487	87.49	84.5	1.93	Sample_129X1_SvJ-OB-1302_R1.fastq.gz	Sample_129X1_SvJ-OB-1302_R2.fastq.gz	HypoT129X1zSvJzOBz1302_sorted.bam
SAMN04537028	OB-1303	129X1/SvJ	HypoT129X1zSvJzOBz1303	3	8406582	6075034	230568	6305602	1286612	1261489	75.01	72.27	1.95	Sample_129X1_SvJ-OB-1303_R1.fastq.gz	Sample_129X1_SvJ-OB-1303_R2.fastq.gz	HypoT129X1zSvJzOBz1303_sorted.bam
SAMN04537029	OB-1398	AKR/J	HypoTAKRzJzOBz1398	4	15154348	13669948	475027	14144975	3285221	3221453	93.34	90.2	1.94	Sample_AKR_J-OB-1398_R1.fastq.gz	Sample_AKR_J-OB-1398_R2.fastq.gz	HypoTAKRzJzOBz1398_sorted.bam
SAMN04537030	OB-1399	AKR/J	HypoTAKRzJzOBz1399	5	15065941	13624708	471239	14095947	3158259	3096704	93.56	90.43	1.95	Sample_AKR_J-OB-1399_R1.fastq.gz	Sample_AKR_J-OB-1399_R2.fastq.gz	HypoTAKRzJzOBz1399_sorted.bam
SAMN04537031	OB-1400	AKR/J	HypoTAKRzJzOBz1400	6	16457199	15058152	536088	15594240	3557721	3491339	94.76	91.5	1.87	Sample_AKR_J-OB-1400_R1.fastq.gz	Sample_AKR_J-OB-1400_R2.fastq.gz	HypoTAKRzJzOBz1400_sorted.bam
SAMN04537032	OB-1346	AXB-12/PgnJ	HypoTAXB12zPgnJzOBz1346	7	7991353	7337181	246084	7583265	1731183	1698060	94.89	91.81	1.91	Sample_AXB12_PgnJ-OB-1346_R1.fastq.gz	Sample_AXB12_PgnJ-OB-1346_R2.fastq.gz	HypoTAXB12zPgnJzOBz1346_sorted.bam
SAMN04537033	OB-1387	AXB-13/PgnJ	HypoTAXB13zPgnJzOBz1387	8	10859809	9937173	348421	10285594	2392379	2346232	94.71	91.5	1.93	Sample_AXB13_PgnJ-OB-1387_R1.fastq.gz	Sample_AXB13_PgnJ-OB-1387_R2.fastq.gz	HypoTAXB13zPgnJzOBz1387_sorted.bam
SAMN04537034	OB-1388	AXB-13/PgnJ	HypoTAXB13zPgnJzOBz1388	9	12633614	11124971	396501	11521472	2666077	2615288	91.2	88.06	1.91	Sample_AXB13_PgnJ-OB-1388_R1.fastq.gz	Sample_AXB13_PgnJ-OB-1388_R2.fastq.gz	HypoTAXB13zPgnJzOBz1388_sorted.bam
SAMN04537035	OB-1462	AXB-13/PgnJ	HypoTAXB13zPgnJzOBz1462	10	13381252	12133574	414683	12548257	2831033	2775849	93.77	90.68	1.95	Sample_AXB13_PgnJ-OB-1462_R1.fastq.gz	Sample_AXB13_PgnJ-OB-1462_R2.fastq.gz	HypoTAXB13zPgnJzOBz1462_sorted.bam
SAMN04537036	OB-571	AXB-15/PgnJ	HypoTAXB15zPgnJzOBz571	11	7495257	6795360	252239	7047599	1561839	1533210	94.03	90.66	1.83	Sample_AXB15_PgnJ-OB-571_R1.fastq.gz	Sample_AXB15_PgnJ-OB-571_R2.fastq.gz	HypoTAXB15zPgnJzOBz571_sorted.bam
SAMN04537037	OB-572	AXB-15/PgnJ	HypoTAXB15zPgnJzOBz572	12	8030783	7289519	271571	7561090	1628549	1598140	94.15	90.77	1.87	Sample_AXB15_PgnJ-OB-572_R1.fastq.gz	Sample_AXB15_PgnJ-OB-572_R2.fastq.gz	HypoTAXB15zPgnJzOBz572_sorted.bam
SAMN04537038	OB-573	AXB-15/PgnJ	HypoTAXB15zPgnJzOBz573	13	8439634	7679709	295766	7975475	1694300	1663057	94.5	91	1.84	Sample_AXB15_PgnJ-OB-573_R1.fastq.gz	Sample_AXB15_PgnJ-OB-573_R2.fastq.gz	HypoTAXB15zPgnJzOBz573_sorted.bam
SAMN04537039	OB-787	AXB-18/PgnJ	HypoTAXB19azPgnJzOBz787	14	12621306	11499267	432695	11931962	2732666	2681500	94.54	91.11	1.87	Sample_AXB19a_PgnJ-OB-787_R1.fastq.gz	Sample_AXB19a_PgnJ-OB-787_R2.fastq.gz	HypoTAXB19azPgnJzOBz787_sorted.bam
SAMN04537040	OB-788	AXB-18/PgnJ	HypoTAXB19azPgnJzOBz788	15	11971188	10827817	420417	11248234	2460446	2414961	93.96	90.45	1.85	Sample_AXB19a_PgnJ-OB-788_R1.fastq.gz	Sample_AXB19a_PgnJ-OB-788_R2.fastq.gz	HypoTAXB19azPgnJzOBz788_sorted.bam
SAMN04537041	OB-789	AXB-18/PgnJ	HypoTAXB19azPgnJzOBz789	16	11133610	10069440	406335	10475775	2203273	2162681	94.09	90.44	1.84	Sample_AXB19a_PgnJ-OB-789_R1.fastq.gz	Sample_AXB19a_PgnJ-OB-789_R2.fastq.gz	HypoTAXB19azPgnJzOBz789_sorted.bam
SAMN04537042	OB-1205	AXB-20/PgnJ	HypoTAXB19bzPgnJzOBz1205	17	15214130	13911552	516880	14428432	3295586	3233357	94.84	91.44	1.89	Sample_AXB19b_PgnJ-OB-1205_R1.fastq.gz	Sample_AXB19b_PgnJ-OB-1205_R2.fastq.gz	HypoTAXB19bzPgnJzOBz1205_sorted.bam
SAMN04537043	OB-276	AXB-20/PgnJ	HypoTAXB19bzPgnJzOBz276	18	13717341	12560724	473456	13034180	2950036	2895387	95.02	91.57	1.85	Sample_AXB19b_PgnJ-OB-276_R1.fastq.gz	Sample_AXB19b_PgnJ-OB-276_R2.fastq.gz	HypoTAXB19bzPgnJzOBz276_sorted.bam
SAMN04537044	OB-277	AXB-20/PgnJ	HypoTAXB19bzPgnJzOBz277	19	16050654	14769355	556907	15326262	3549697	3483291	95.49	92.02	1.87	Sample_AXB19b_PgnJ-OB-277_R1.fastq.gz	Sample_AXB19b_PgnJ-OB-277_R2.fastq.gz	HypoTAXB19bzPgnJzOBz277_sorted.bam
SAMN04537045	OB-285	AXB-19/PgnJ	HypoTAXB19zPgnJzOBz285	20	14572411	13356872	495505	13852377	3125714	3067960	95.06	91.66	1.85	Sample_AXB19_PgnJ-OB-285_R1.fastq.gz	Sample_AXB19_PgnJ-OB-285_R2.fastq.gz	HypoTAXB19zPgnJzOBz285_sorted.bam
SAMN04537046	OB-286	AXB-19/PgnJ	HypoTAXB19zPgnJzOBz286	21	9712664	8877089	320679	9197768	2091988	2052537	94.7	91.4	1.89	Sample_AXB19_PgnJ-OB-286_R1.fastq.gz	Sample_AXB19_PgnJ-OB-286_R2.fastq.gz	HypoTAXB19zPgnJzOBz286_sorted.bam
SAMN04537047	OB-755	AXB-19/PgnJ	HypoTAXB19zPgnJzOBz755	22	6730028	6140704	226121	6366825	1497965	1469988	94.6	91.24	1.87	Sample_AXB19_PgnJ-OB-755_R1.fastq.gz	Sample_AXB19_PgnJ-OB-755_R2.fastq.gz	HypoTAXB19zPgnJzOBz755_sorted.bam
SAMN04537048	OB-264	AXB-2/PgnJ	HypoTAXB2zPgnJzOBz264	23	18697249	17061271	627640	17688911	3897851	3824324	94.61	91.25	1.89	Sample_AXB2_PgnJ-OB-264_R1.fastq.gz	Sample_AXB2_PgnJ-OB-264_R2.fastq.gz	HypoTAXB2zPgnJzOBz264_sorted.bam
SAMN04537049	OB-265	AXB-2/PgnJ	HypoTAXB2zPgnJzOBz265	24	11805053	10777662	392893	11170555	2536370	2488453	94.63	91.3	1.89	Sample_AXB2_PgnJ-OB-265_R1.fastq.gz	Sample_AXB2_PgnJ-OB-265_R2.fastq.gz	HypoTAXB2zPgnJzOBz265_sorted.bam
SAMN04537050	OB-1420	AXB-5/PgnJ	HypoTAXB5zPgnJzOBz1420	25	13640457	12505704	451078	12956782	2859004	2805133	94.99	91.68	1.88	Sample_AXB5_PgnJ-OB-1420_R1.fastq.gz	Sample_AXB5_PgnJ-OB-1420_R2.fastq.gz	HypoTAXB5zPgnJzOBz1420_sorted.bam
SAMN04537051	OB-1421	AXB-5/PgnJ	HypoTAXB5zPgnJzOBz1421	26	15226499	13905093	499173	14404266	3240651	3178662	94.6	91.32	1.91	Sample_AXB5_PgnJ-OB-1421_R1.fastq.gz	Sample_AXB5_PgnJ-OB-1421_R2.fastq.gz	HypoTAXB5zPgnJzOBz1421_sorted.bam
SAMN04537052	OB-1422	AXB-5/PgnJ	HypoTAXB5zPgnJzOBz1422	27	10461980	9545075	342330	9887405	2212888	2170595	94.51	91.24	1.91	Sample_AXB5_PgnJ-OB-1422_R1.fastq.gz	Sample_AXB5_PgnJ-OB-1422_R2.fastq.gz	HypoTAXB5zPgnJzOBz1422_sorted.bam
SAMN04537053	OB-540	AXB-6/PgnJ	HypoTAXB6zPgnJzOBz540	28	11595590	10638284	366218	11004502	2517685	2468854	94.9	91.74	1.94	Sample_AXB6_PgnJ-OB-540_R1.fastq.gz	Sample_AXB6_PgnJ-OB-540_R2.fastq.gz	HypoTAXB6zPgnJzOBz540_sorted.bam
SAMN04537054	OB-541	AXB-6/PgnJ	HypoTAXB6zPgnJzOBz541	29	10313550	9476860	326638	9803498	2249795	2206579	95.05	91.89	1.92	Sample_AXB6_PgnJ-OB-541_R1.fastq.gz	Sample_AXB6_PgnJ-OB-541_R2.fastq.gz	HypoTAXB6zPgnJzOBz541_sorted.bam
SAMN04537055	OB-627	AXB-6/PgnJ	HypoTAXB8zPgnJzOBz627	30	14969610	13752145	502104	14254249	3293374	3232199	95.22	91.87	1.86	Sample_AXB8_PgnJ-OB-627_R1.fastq.gz	Sample_AXB8_PgnJ-OB-627_R2.fastq.gz	HypoTAXB8zPgnJzOBz627_sorted.bam
SAMN04537056	OB-628	AXB-8/PgnJ	HypoTAXB8zPgnJzOBz628	31	12735313	11692818	421635	12114453	2696313	2644249	95.12	91.81	1.93	Sample_AXB8_PgnJ-OB-628_R1.fastq.gz	Sample_AXB8_PgnJ-OB-628_R2.fastq.gz	HypoTAXB8zPgnJzOBz628_sorted.bam
SAMN04537057	OB-629	AXB-8/PgnJ	HypoTAXB8zPgnJzOBz629	32	14297214	13149715	479718	13629433	3038746	2980584	95.33	91.97	1.91	Sample_AXB8_PgnJ-OB-629_R1.fastq.gz	Sample_AXB8_PgnJ-OB-629_R2.fastq.gz	HypoTAXB8zPgnJzOBz629_sorted.bam
SAMN04537058	OB-1430	A/J	HypoTAzJzOBz1430	33	13161625	11986175	417632	12403807	2859384	2804392	94.24	91.07	1.92	Sample_A_J-OB-1430_R1.fastq.gz	Sample_A_J-OB-1430_R2.fastq.gz	HypoTAzJzOBz1430_sorted.bam
SAMN04537059	OB-1431	A/J	HypoTAzJzOBz1431	34	11337663	10365865	363703	10729568	2407455	2361330	94.64	91.43	1.92	Sample_A_J-OB-1431_R1.fastq.gz	Sample_A_J-OB-1431_R2.fastq.gz	HypoTAzJzOBz1431_sorted.bam
SAMN04537060	OB-1432	A/J	HypoTAzJzOBz1432	35	10967536	9982474	352991	10335465	2224370	2182136	94.24	91.02	1.9	Sample_A_J-OB-1432_R1.fastq.gz	Sample_A_J-OB-1432_R2.fastq.gz	HypoTAzJzOBz1432_sorted.bam
SAMN04537061	OB-589	BALB/cJ	HypoTBALBzcJzOBz589	36	15083346	13442159	497995	13940154	3127808	3071238	92.42	89.12	1.81	Sample_BALB_cJ-OB-589_R1.fastq.gz	Sample_BALB_cJ-OB-589_R2.fastq.gz	HypoTBALBzcJzOBz589_sorted.bam
SAMN04537062	OB-806	BALB/cJ	HypoTBALBzcJzOBz806	37	9999727	9047199	339632	9386831	2070780	2033563	93.87	90.47	1.8	Sample_BALB_cJ-OB-806_R1.fastq.gz	Sample_BALB_cJ-OB-806_R2.fastq.gz	HypoTBALBzcJzOBz806_sorted.bam
SAMN04537063	OB-807	BALB/cJ	HypoTBALBzcJzOBz807	38	12048912	10923004	423078	11346082	2518970	2473828	94.17	90.66	1.79	Sample_BALB_cJ-OB-807_R1.fastq.gz	Sample_BALB_cJ-OB-807_R2.fastq.gz	HypoTBALBzcJzOBz807_sorted.bam
SAMN04537064	OB-399	BUB/BnJ	HypoTBUBzBnJzOBz399	39	16724440	15234233	569398	15803631	3702889	3633035	94.49	91.09	1.89	Sample_BUB_BnJ-OB-399_R1.fastq.gz	Sample_BUB_BnJ-OB-399_R2.fastq.gz	HypoTBUBzBnJzOBz399_sorted.bam
SAMN04537065	OB-506	BUB/BnJ	HypoTBUBzBnJzOBz506	40	14344920	12953275	485452	13438727	2959817	2904800	93.68	90.3	1.86	Sample_BUB_BnJ-OB-506_R1.fastq.gz	Sample_BUB_BnJ-OB-506_R2.fastq.gz	HypoTBUBzBnJzOBz506_sorted.bam
SAMN04537066	OB-507	BUB/BnJ	HypoTBUBzBnJzOBz507	41	19164247	17140647	673492	17814139	3768511	3701831	92.96	89.44	1.77	Sample_BUB_BnJ-OB-507_R1.fastq.gz	Sample_BUB_BnJ-OB-507_R2.fastq.gz	HypoTBUBzBnJzOBz507_sorted.bam
SAMN04537067	OB-1362	BXA-11/PgnJ	HypoTBXA11zPgnJzOBz1362	42	10230459	9276877	335351	9612228	2152975	2112641	93.96	90.68	1.87	Sample_BXA11_PgnJ-OB-1362_R1.fastq.gz	Sample_BXA11_PgnJ-OB-1362_R2.fastq.gz	HypoTBXA11zPgnJzOBz1362_sorted.bam
SAMN04537068	OB-579	BXA-11/PgnJ	HypoTBXA11zPgnJzOBz579	43	8365966	7572337	277823	7850160	1725906	1693241	93.83	90.51	1.89	Sample_BXA11_PgnJ-OB-579_R1.fastq.gz	Sample_BXA11_PgnJ-OB-579_R2.fastq.gz	HypoTBXA11zPgnJzOBz579_sorted.bam
SAMN04537069	OB-580	BXA-11/PgnJ	HypoTBXA11zPgnJzOBz580	44	14263866	12911535	490389	13401924	2779352	2727738	93.96	90.52	1.86	Sample_BXA11_PgnJ-OB-580_R1.fastq.gz	Sample_BXA11_PgnJ-OB-580_R2.fastq.gz	HypoTBXA11zPgnJzOBz580_sorted.bam
SAMN04537070	OB-670	BXA-12/PgnJ	HypoTBXA12zPgnJzOBz670	45	12860026	11803109	420529	12223638	2759993	2708377	95.05	91.78	1.87	Sample_BXA12_PgnJ-OB-670_R1.fastq.gz	Sample_BXA12_PgnJ-OB-670_R2.fastq.gz	HypoTBXA12zPgnJzOBz670_sorted.bam
SAMN04537071	OB-672	BXA-12/PgnJ	HypoTBXA12zPgnJzOBz672	46	13052097	11878031	483947	12361978	2649947	2603046	94.71	91	1.77	Sample_BXA12_PgnJ-OB-672_R1.fastq.gz	Sample_BXA12_PgnJ-OB-672_R2.fastq.gz	HypoTBXA12zPgnJzOBz672_sorted.bam
SAMN04537072	OB-199	BXA-14/PgnJ	HypoTBXA14zPgnJzOBz199	47	8178850	7505888	266103	7771991	1775623	1742238	95.03	91.77	1.88	Sample_BXA14_PgnJ-OB-199_R1.fastq.gz	Sample_BXA14_PgnJ-OB-199_R2.fastq.gz	HypoTBXA14zPgnJzOBz199_sorted.bam
SAMN04537073	OB-200	BXA-14/PgnJ	HypoTBXA14zPgnJzOBz200	48	8180155	7494719	264254	7758973	1791053	1757858	94.85	91.62	1.85	Sample_BXA14_PgnJ-OB-200_R1.fastq.gz	Sample_BXA14_PgnJ-OB-200_R2.fastq.gz	HypoTBXA14zPgnJzOBz200_sorted.bam
SAMN04537074	OB-201	BXA-14/PgnJ	HypoTBXA14zPgnJzOBz201	49	16789034	15420148	558647	15978795	3613991	3546379	95.17	91.85	1.87	Sample_BXA14_PgnJ-OB-201_R1.fastq.gz	Sample_BXA14_PgnJ-OB-201_R2.fastq.gz	HypoTBXA14zPgnJzOBz201_sorted.bam
SAMN04537075	OB-208	BXA-24/PgnJ	HypoTBXA24zPgnJzOBz208	50	19123833	17619463	637632	18257095	4114251	4036983	95.47	92.13	1.88	Sample_BXA24_PgnJ-OB-208_R1.fastq.gz	Sample_BXA24_PgnJ-OB-208_R2.fastq.gz	HypoTBXA24zPgnJzOBz208_sorted.bam
SAMN04537076	OB-209	BXA-24/PgnJ	HypoTBXA24zPgnJzOBz209	51	17385887	15852356	601010	16453366	3716795	3648331	94.64	91.18	1.84	Sample_BXA24_PgnJ-OB-209_R1.fastq.gz	Sample_BXA24_PgnJ-OB-209_R2.fastq.gz	HypoTBXA24zPgnJzOBz209_sorted.bam
SAMN04537077	OB-107	BXA-2/PgnJ	HypoTBXA2zPgnJzOBz107	52	21451092	19486396	730717	20217113	4699052	4614909	94.25	90.84	1.79	Sample_BXA2_PgnJ-OB-107_R1.fastq.gz	Sample_BXA2_PgnJ-OB-107_R2.fastq.gz	HypoTBXA2zPgnJzOBz107_sorted.bam
SAMN04537078	OB-108	BXA-2/PgnJ	HypoTBXA2zPgnJzOBz108	53	14172197	13003834	474487	13478321	3030866	2975514	95.1	91.76	1.83	Sample_BXA2_PgnJ-OB-108_R1.fastq.gz	Sample_BXA2_PgnJ-OB-108_R2.fastq.gz	HypoTBXA2zPgnJzOBz108_sorted.bam
SAMN04537079	OB-816	BXA-2/PgnJ	HypoTBXA2zPgnJzOBz816	54	8634182	7873323	289209	8162532	1914354	1878723	94.54	91.19	1.86	Sample_BXA2_PgnJ-OB-816_R1.fastq.gz	Sample_BXA2_PgnJ-OB-816_R2.fastq.gz	HypoTBXA2zPgnJzOBz816_sorted.bam
SAMN04537080	OB-307	BXA-4/PgnJ	HypoTBXA4zPgnJzOBz307	55	15267454	14124513	500602	14625115	3416959	3351663	95.79	92.51	1.91	Sample_BXA4_PgnJ-OB-307_R1.fastq.gz	Sample_BXA4_PgnJ-OB-307_R2.fastq.gz	HypoTBXA4zPgnJzOBz307_sorted.bam
SAMN04537081	OB-308	BXA-4/PgnJ	HypoTBXA4zPgnJzOBz308	56	11418063	10523247	365711	10888958	2543664	2495624	95.37	92.16	1.89	Sample_BXA4_PgnJ-OB-308_R1.fastq.gz	Sample_BXA4_PgnJ-OB-308_R2.fastq.gz	HypoTBXA4zPgnJzOBz308_sorted.bam
SAMN04537082	OB-309	BXA-4/PgnJ	HypoTBXA4zPgnJzOBz309	57	14046972	13008897	452454	13461351	3194770	3132652	95.83	92.61	1.94	Sample_BXA4_PgnJ-OB-309_R1.fastq.gz	Sample_BXA4_PgnJ-OB-309_R2.fastq.gz	HypoTBXA4zPgnJzOBz309_sorted.bam
SAMN04537083	OB-311	BXA-7/PgnJ	HypoTBXA7zPgnJzOBz311	58	23079446	21341331	744029	22085360	5089252	4993096	95.69	92.47	1.89	Sample_BXA7_PgnJ-OB-311_R1.fastq.gz	Sample_BXA7_PgnJ-OB-311_R2.fastq.gz	HypoTBXA7zPgnJzOBz311_sorted.bam
SAMN04537084	OB-312	BXA-7/PgnJ	HypoTBXA7zPgnJzOBz312	59	16345826	15125661	507396	15633057	3583297	3513616	95.64	92.54	1.94	Sample_BXA7_PgnJ-OB-312_R1.fastq.gz	Sample_BXA7_PgnJ-OB-312_R2.fastq.gz	HypoTBXA7zPgnJzOBz312_sorted.bam
SAMN04537085	OB-313	BXA-7/PgnJ	HypoTBXA7zPgnJzOBz313	60	12246232	11302510	389995	11692505	2662900	2612790	95.48	92.29	1.88	Sample_BXA7_PgnJ-OB-313_R1.fastq.gz	Sample_BXA7_PgnJ-OB-313_R2.fastq.gz	HypoTBXA7zPgnJzOBz313_sorted.bam
SAMN04537086	OB-1359	BXA-8/PgnJ	HypoTBXA8zPgnJzOBz1359	61	13455638	12372956	438789	12811745	2952482	2894876	95.21	91.95	1.95	Sample_BXA8_PgnJ-OB-1359_R1.fastq.gz	Sample_BXA8_PgnJ-OB-1359_R2.fastq.gz	HypoTBXA8zPgnJzOBz1359_sorted.bam
SAMN04537087	OB-1423	BXA-8/PgnJ	HypoTBXA8zPgnJzOBz1423	62	8460945	7799303	270213	8069516	1871165	1835427	95.37	92.18	1.91	Sample_BXA8_PgnJ-OB-1423_R1.fastq.gz	Sample_BXA8_PgnJ-OB-1423_R2.fastq.gz	HypoTBXA8zPgnJzOBz1423_sorted.bam
SAMN04537088	OB-1424	BXA-8/PgnJ	HypoTBXA8zPgnJzOBz1424	63	11731782	10797617	368953	11166570	2556035	2506095	95.18	92.04	1.95	Sample_BXA8_PgnJ-OB-1424_R1.fastq.gz	Sample_BXA8_PgnJ-OB-1424_R2.fastq.gz	HypoTBXA8zPgnJzOBz1424_sorted.bam
SAMN04537089	OB-795	BXD-11/TyJ	HypoTBXD11zTyJzOBz795	64	12513392	11383507	441414	11824921	2662624	2614258	94.5	90.97	1.82	Sample_BXD11_TyJ-OB-795_R1.fastq.gz	Sample_BXD11_TyJ-OB-795_R2.fastq.gz	HypoTBXD11zTyJzOBz795_sorted.bam
SAMN04537090	OB-847	BXD-11/TyJ	HypoTBXD11zTyJzOBz847	65	14196605	12968158	484061	13452219	3120799	3063372	94.76	91.35	1.84	Sample_BXD11_TyJ-OB-847_R1.fastq.gz	Sample_BXD11_TyJ-OB-847_R2.fastq.gz	HypoTBXD11zTyJzOBz847_sorted.bam
SAMN04537091	OB-546	BXD-12/TyJ	HypoTBXD12zTyJzOBz546	66	12442274	11294288	428547	11722835	2665676	2615535	94.22	90.77	1.88	Sample_BXD12_TyJ-OB-546_R1.fastq.gz	Sample_BXD12_TyJ-OB-546_R2.fastq.gz	HypoTBXD12zTyJzOBz546_sorted.bam
SAMN04537092	OB-547	BXD-12/TyJ	HypoTBXD12zTyJzOBz547	67	10510936	7942064	868662	8810726	1087519	1070978	83.82	75.56	1.52	Sample_BXD12_TyJ-OB-547_R1.fastq.gz	Sample_BXD12_TyJ-OB-547_R2.fastq.gz	HypoTBXD12zTyJzOBz547_sorted.bam
SAMN04537093	OB-838	BXD-12/TyJ	HypoTBXD12zTyJzOBz838	68	16721514	15155966	572919	15728885	3608294	3541062	94.06	90.64	1.86	Sample_BXD12_TyJ-OB-838_R1.fastq.gz	Sample_BXD12_TyJ-OB-838_R2.fastq.gz	HypoTBXD12zTyJzOBz838_sorted.bam
SAMN04537094	OB-698	BXD-14/TyJ	HypoTBXD14zTyJzOBz698	69	17886274	16212474	629233	16841707	3546618	3480174	94.16	90.64	1.87	Sample_BXD14_TyJ-OB-698_R1.fastq.gz	Sample_BXD14_TyJ-OB-698_R2.fastq.gz	HypoTBXD14zTyJzOBz698_sorted.bam
SAMN04537095	OB-745	BXD-14/TyJ	HypoTBXD14zTyJzOBz745	70	18835369	17191008	620439	17811447	3897975	3824180	94.56	91.27	1.89	Sample_BXD14_TyJ-OB-745_R1.fastq.gz	Sample_BXD14_TyJ-OB-745_R2.fastq.gz	HypoTBXD14zTyJzOBz745_sorted.bam
SAMN04537096	OB-746	BXD-14/TyJ	HypoTBXD14zTyJzOBz746	71	7997917	7317587	262114	7579701	1651061	1619478	94.77	91.49	1.91	Sample_BXD14_TyJ-OB-746_R1.fastq.gz	Sample_BXD14_TyJ-OB-746_R2.fastq.gz	HypoTBXD14zTyJzOBz746_sorted.bam
SAMN04537097	OB-1414	BXD-15/TyJ	HypoTBXD15zTyJzOBz1414	72	13783631	12639480	433839	13073319	2863452	2808874	94.85	91.7	1.91	Sample_BXD15_TyJ-OB-1414_R1.fastq.gz	Sample_BXD15_TyJ-OB-1414_R2.fastq.gz	HypoTBXD15zTyJzOBz1414_sorted.bam
SAMN04537098	OB-1415	BXD-15/TyJ	HypoTBXD15zTyJzOBz1415	257	13406232	12308995	421565	12730560	2825244	2770102	94.96	91.82	1.95	Sample_BXD15_TyJ-OB-1415_R1.fastq.gz	Sample_BXD15_TyJ-OB-1415_R2.fastq.gz	HypoTBXD15zTyJzOBz1415_sorted.bam
SAMN04537099	OB-278	BXD-15/TyJ	HypoTBXD15zTyJzOBz278	258	12986343	11900825	422096	12322921	2686435	2634879	94.89	91.64	1.92	Sample_BXD15_TyJ-OB-278_R1.fastq.gz	Sample_BXD15_TyJ-OB-278_R2.fastq.gz	HypoTBXD15zTyJzOBz278_sorted.bam
SAMN04537100	OB-220	BXD-16/TyJ	HypoTBXD16zTyJzOBz220	259	10369988	9347832	352249	9700081	2137732	2096379	93.54	90.14	1.93	Sample_BXD16_TyJ-OB-220_R1.fastq.gz	Sample_BXD16_TyJ-OB-220_R2.fastq.gz	HypoTBXD16zTyJzOBz220_sorted.bam
SAMN04537101	OB-221	BXD-16/TyJ	HypoTBXD16zTyJzOBz221	260	17455863	15905158	609012	16514170	3700905	3630514	94.61	91.12	1.9	Sample_BXD16_TyJ-OB-221_R1.fastq.gz	Sample_BXD16_TyJ-OB-221_R2.fastq.gz	HypoTBXD16zTyJzOBz221_sorted.bam
SAMN04537102	OB-222	BXD-16/TyJ	HypoTBXD16zTyJzOBz222	261	12774272	11647435	418291	12065726	2670621	2618778	94.45	91.18	1.94	Sample_BXD16_TyJ-OB-222_R1.fastq.gz	Sample_BXD16_TyJ-OB-222_R2.fastq.gz	HypoTBXD16zTyJzOBz222_sorted.bam
SAMN04537103	OB-369	BXD-19/TyJ	HypoTBXD19zTyJzOBz369	262	7951149	7293647	257254	7550901	1727215	1694505	94.97	91.73	1.89	Sample_BXD19_TyJ-OB-369_R1.fastq.gz	Sample_BXD19_TyJ-OB-369_R2.fastq.gz	HypoTBXD19zTyJzOBz369_sorted.bam
SAMN04537104	OB-370	BXD-19/TyJ	HypoTBXD19zTyJzOBz370	263	8797176	8087394	281548	8368942	1920578	1883072	95.13	91.93	1.95	Sample_BXD19_TyJ-OB-370_R1.fastq.gz	Sample_BXD19_TyJ-OB-370_R2.fastq.gz	HypoTBXD19zTyJzOBz370_sorted.bam
SAMN04537105	OB-371	BXD-19/TyJ	HypoTBXD19zTyJzOBz371	264	8185577	7502818	278624	7781442	1713782	1681600	95.06	91.66	1.88	Sample_BXD19_TyJ-OB-371_R1.fastq.gz	Sample_BXD19_TyJ-OB-371_R2.fastq.gz	HypoTBXD19zTyJzOBz371_sorted.bam
SAMN04537106	OB-191	BXD-20/TyJ	HypoTBXD20zTyJzOBz191	265	13126826	11738708	423521	12162229	2788613	2736568	92.65	89.43	1.87	Sample_BXD20_TyJ-OB-191_R1.fastq.gz	Sample_BXD20_TyJ-OB-191_R2.fastq.gz	HypoTBXD20zTyJzOBz191_sorted.bam
SAMN04537107	OB-192	BXD-20/TyJ	HypoTBXD20zTyJzOBz192	266	12316538	11277815	423848	11701663	2601934	2554925	95.01	91.57	1.81	Sample_BXD20_TyJ-OB-192_R1.fastq.gz	Sample_BXD20_TyJ-OB-192_R2.fastq.gz	HypoTBXD20zTyJzOBz192_sorted.bam
SAMN04537108	OB-559	BXD-20/TyJ	HypoTBXD20zTyJzOBz559	267	11688497	10715973	392184	11108157	2544459	2498467	95.03	91.68	1.81	Sample_BXD20_TyJ-OB-559_R1.fastq.gz	Sample_BXD20_TyJ-OB-559_R2.fastq.gz	HypoTBXD20zTyJzOBz559_sorted.bam
SAMN04537109	OB-293	BXD-21/TyJ	HypoTBXD21zTyJzOBz293	268	10895445	9805032	363523	10168555	2343527	2300646	93.33	89.99	1.83	Sample_BXD21_TyJ-OB-293_R1.fastq.gz	Sample_BXD21_TyJ-OB-293_R2.fastq.gz	HypoTBXD21zTyJzOBz293_sorted.bam
SAMN04537110	OB-294	BXD-21/TyJ	HypoTBXD21zTyJzOBz294	269	11470510	10523194	363250	10886444	2512468	2465295	94.91	91.74	1.88	Sample_BXD21_TyJ-OB-294_R1.fastq.gz	Sample_BXD21_TyJ-OB-294_R2.fastq.gz	HypoTBXD21zTyJzOBz294_sorted.bam
SAMN04537111	OB-296	BXD-21/TyJ	HypoTBXD21zTyJzOBz296	270	13853667	12767660	452159	13219819	3003411	2945349	95.42	92.16	1.93	Sample_BXD21_TyJ-OB-296_R1.fastq.gz	Sample_BXD21_TyJ-OB-296_R2.fastq.gz	HypoTBXD21zTyJzOBz296_sorted.bam
SAMN04537112	OB-377	BXD-24/TyJ	HypoTBXD24zTyJzOBz377	271	5886672	5423979	193326	5617305	1298638	1274741	95.42	92.14	1.84	Sample_BXD24_TyJ-OB-377_R1.fastq.gz	Sample_BXD24_TyJ-OB-377_R2.fastq.gz	HypoTBXD24zTyJzOBz377_sorted.bam
SAMN04537113	OB-378	BXD-24/TyJ	HypoTBXD24zTyJzOBz378	272	9039841	8289551	300529	8590080	1925658	1889272	95.02	91.7	1.89	Sample_BXD24_TyJ-OB-378_R1.fastq.gz	Sample_BXD24_TyJ-OB-378_R2.fastq.gz	HypoTBXD24zTyJzOBz378_sorted.bam
SAMN04537114	OB-379	BXD-24/TyJ	HypoTBXD24zTyJzOBz379	273	6207006	5710367	203584	5913951	1380249	1354648	95.28	92	1.85	Sample_BXD24_TyJ-OB-379_R1.fastq.gz	Sample_BXD24_TyJ-OB-379_R2.fastq.gz	HypoTBXD24zTyJzOBz379_sorted.bam
SAMN04537115	OB-556	BXD-32/TyJ	HypoTBXD32zTyJzOBz556	274	12989239	11847751	461116	12308867	2843057	2790540	94.76	91.21	1.85	Sample_BXD32_TyJ-OB-556_R1.fastq.gz	Sample_BXD32_TyJ-OB-556_R2.fastq.gz	HypoTBXD32zTyJzOBz556_sorted.bam
SAMN04537116	OB-557	BXD-32/TyJ	HypoTBXD32zTyJzOBz557	275	11495608	10415146	425874	10841020	2363128	2320890	94.31	90.6	1.79	Sample_BXD32_TyJ-OB-557_R1.fastq.gz	Sample_BXD32_TyJ-OB-557_R2.fastq.gz	HypoTBXD32zTyJzOBz557_sorted.bam
SAMN04537117	OB-558	BXD-32/TyJ	HypoTBXD32zTyJzOBz558	276	12929910	11750011	471155	12221166	2622326	2575504	94.52	90.87	1.79	Sample_BXD32_TyJ-OB-558_R1.fastq.gz	Sample_BXD32_TyJ-OB-558_R2.fastq.gz	HypoTBXD32zTyJzOBz558_sorted.bam
SAMN04537118	OB-472	BXD-34/TyJ	HypoTBXD34zTyJzOBz472	277	14789806	13449801	491295	13941096	2986915	2930784	94.26	90.94	1.88	Sample_BXD34_TyJ-OB-472_R1.fastq.gz	Sample_BXD34_TyJ-OB-472_R2.fastq.gz	HypoTBXD34zTyJzOBz472_sorted.bam
SAMN04537119	OB-473	BXD-34/TyJ	HypoTBXD34zTyJzOBz473	278	15994132	14563537	557245	15120782	3251314	3191716	94.54	91.06	1.83	Sample_BXD34_TyJ-OB-473_R1.fastq.gz	Sample_BXD34_TyJ-OB-473_R2.fastq.gz	HypoTBXD34zTyJzOBz473_sorted.bam
SAMN04537120	OB-174	BXD-36/TyJ	HypoTBXD36zTyJzOBz174	279	23402476	21510329	755394	22265723	5128659	5032348	95.14	91.91	1.88	Sample_BXD36_TyJ-OB-174_R1.fastq.gz	Sample_BXD36_TyJ-OB-174_R2.fastq.gz	HypoTBXD36zTyJzOBz174_sorted.bam
SAMN04537121	OB-175	BXD-36/TyJ	HypoTBXD36zTyJzOBz175	280	12209814	11171147	408994	11580141	2567723	2520706	94.84	91.49	1.83	Sample_BXD36_TyJ-OB-175_R1.fastq.gz	Sample_BXD36_TyJ-OB-175_R2.fastq.gz	HypoTBXD36zTyJzOBz175_sorted.bam
SAMN04537122	OB-176	BXD-36/TyJ	HypoTBXD36zTyJzOBz176	281	12089542	11024876	410184	11435060	2473626	2427897	94.59	91.19	1.85	Sample_BXD36_TyJ-OB-176_R1.fastq.gz	Sample_BXD36_TyJ-OB-176_R2.fastq.gz	HypoTBXD36zTyJzOBz176_sorted.bam
SAMN04537123	OB-708	BXD-38/TyJ	HypoTBXD38zTyJzOBz708	282	13263636	11930920	477749	12408669	2657881	2608851	93.55	89.95	1.84	Sample_BXD38_TyJ-OB-708_R1.fastq.gz	Sample_BXD38_TyJ-OB-708_R2.fastq.gz	HypoTBXD38zTyJzOBz708_sorted.bam
SAMN04537124	OB-709	BXD-38/TyJ	HypoTBXD38zTyJzOBz709	73	16771681	15192437	593464	15785901	3632826	3566513	94.12	90.58	1.83	Sample_BXD38_TyJ-OB-709_R1.fastq.gz	Sample_BXD38_TyJ-OB-709_R2.fastq.gz	HypoTBXD38zTyJzOBz709_sorted.bam
SAMN04537125	OB-800	BXD-38/TyJ	HypoTBXD38zTyJzOBz800	74	20501189	18698082	741002	19439084	4356284	4277820	94.82	91.2	1.8	Sample_BXD38_TyJ-OB-800_R1.fastq.gz	Sample_BXD38_TyJ-OB-800_R2.fastq.gz	HypoTBXD38zTyJzOBz800_sorted.bam
SAMN04537126	OB-250	BXD-39/TyJ	HypoTBXD39zTyJzOBz250	75	17032624	15647382	582238	16229620	3689768	3620976	95.29	91.87	1.86	Sample_BXD39_TyJ-OB-250_R1.fastq.gz	Sample_BXD39_TyJ-OB-250_R2.fastq.gz	HypoTBXD39zTyJzOBz250_sorted.bam
SAMN04537127	OB-251	BXD-39/TyJ	HypoTBXD39zTyJzOBz251	76	18964877	17383883	659369	18043252	4101206	4025003	95.14	91.66	1.86	Sample_BXD39_TyJ-OB-251_R1.fastq.gz	Sample_BXD39_TyJ-OB-251_R2.fastq.gz	HypoTBXD39zTyJzOBz251_sorted.bam
SAMN04537128	OB-252	BXD-39/TyJ	HypoTBXD39zTyJzOBz252	77	19621271	17824514	652201	18476715	4160286	4082102	94.17	90.84	1.88	Sample_BXD39_TyJ-OB-252_R1.fastq.gz	Sample_BXD39_TyJ-OB-252_R2.fastq.gz	HypoTBXD39zTyJzOBz252_sorted.bam
SAMN04537129	OB-666	BXD-40/TyJ	HypoTBXD40zTyJzOBz666	78	16230475	14844883	589757	15434640	3299163	3239310	95.1	91.46	1.81	Sample_BXD40_TyJ-OB-666_R1.fastq.gz	Sample_BXD40_TyJ-OB-666_R2.fastq.gz	HypoTBXD40zTyJzOBz666_sorted.bam
SAMN04537130	OB-667	BXD-40/TyJ	HypoTBXD40zTyJzOBz667	79	13739447	12618960	467123	13086083	2993123	2938467	95.24	91.84	1.83	Sample_BXD40_TyJ-OB-667_R1.fastq.gz	Sample_BXD40_TyJ-OB-667_R2.fastq.gz	HypoTBXD40zTyJzOBz667_sorted.bam
SAMN04537131	OB-668	BXD-40/TyJ	HypoTBXD40zTyJzOBz668	80	13959101	12778822	466930	13245752	2980757	2925521	94.89	91.54	1.85	Sample_BXD40_TyJ-OB-668_R1.fastq.gz	Sample_BXD40_TyJ-OB-668_R2.fastq.gz	HypoTBXD40zTyJzOBz668_sorted.bam
SAMN04537132	OB-1136	BXD43	HypoTBXD43zRwwJzOBz1136	81	14112675	12745967	471476	13217443	3087737	3029935	93.66	90.32	1.87	Sample_BXD43_RwwJ-OB-1136_R1.fastq.gz	Sample_BXD43_RwwJ-OB-1136_R2.fastq.gz	HypoTBXD43zRwwJzOBz1136_sorted.bam
SAMN04537133	OB-1137	BXD43	HypoTBXD43zRwwJzOBz1137	82	18279877	16767805	617708	17385513	3927486	3854193	95.11	91.73	1.87	Sample_BXD43_RwwJ-OB-1137_R1.fastq.gz	Sample_BXD43_RwwJ-OB-1137_R2.fastq.gz	HypoTBXD43zRwwJzOBz1137_sorted.bam
SAMN04537134	OB-1138	BXD43	HypoTBXD43zRwwJzOBz1138	83	10922484	9985528	368524	10354052	2237789	2197109	94.8	91.42	1.82	Sample_BXD43_RwwJ-OB-1138_R1.fastq.gz	Sample_BXD43_RwwJ-OB-1138_R2.fastq.gz	HypoTBXD43zRwwJzOBz1138_sorted.bam
SAMN04537135	OB-1024	BXD44	HypoTBXD44zRwwJzOBz1024	84	10452654	9475991	345412	9821403	2219702	2177842	93.96	90.66	1.89	Sample_BXD44_RwwJ-OB-1024_R1.fastq.gz	Sample_BXD44_RwwJ-OB-1024_R2.fastq.gz	HypoTBXD44zRwwJzOBz1024_sorted.bam
SAMN04537136	OB-917	BXD44	HypoTBXD44zRwwJzOBz917	85	9376850	8554038	310085	8864123	2006422	1968422	94.53	91.23	1.89	Sample_BXD44_RwwJ-OB-917_R1.fastq.gz	Sample_BXD44_RwwJ-OB-917_R2.fastq.gz	HypoTBXD44zRwwJzOBz917_sorted.bam
SAMN04537137	OB-918	BXD44	HypoTBXD44zRwwJzOBz918	86	9984398	9113463	335620	9449083	2074947	2035901	94.64	91.28	1.88	Sample_BXD44_RwwJ-OB-918_R1.fastq.gz	Sample_BXD44_RwwJ-OB-918_R2.fastq.gz	HypoTBXD44zRwwJzOBz918_sorted.bam
SAMN04537138	OB-1117	BXD45	HypoTBXD45zRwwJzOBz1117	87	15700511	14354830	525741	14880571	3295821	3234191	94.78	91.43	1.87	Sample_BXD45_RwwJ-OB-1117_R1.fastq.gz	Sample_BXD45_RwwJ-OB-1117_R2.fastq.gz	HypoTBXD45zRwwJzOBz1117_sorted.bam
SAMN04537139	OB-1147	BXD45	HypoTBXD45zRwwJzOBz1147	88	14659761	13322905	493346	13816251	3040523	2983821	94.25	90.88	1.86	Sample_BXD45_RwwJ-OB-1147_R1.fastq.gz	Sample_BXD45_RwwJ-OB-1147_R2.fastq.gz	HypoTBXD45zRwwJzOBz1147_sorted.bam
SAMN04537140	OB-1148	BXD45	HypoTBXD45zRwwJzOBz1148	89	8843653	8016739	294834	8311573	1838394	1804250	93.98	90.65	1.86	Sample_BXD45_RwwJ-OB-1148_R1.fastq.gz	Sample_BXD45_RwwJ-OB-1148_R2.fastq.gz	HypoTBXD45zRwwJzOBz1148_sorted.bam
SAMN04537141	OB-1127	BXD48	HypoTBXD48zRwwJzOBz1127	90	12467327	10609078	375703	10984781	2498207	2451677	88.11	85.1	1.86	Sample_BXD48_RwwJ-OB-1127_R1.fastq.gz	Sample_BXD48_RwwJ-OB-1127_R2.fastq.gz	HypoTBXD48zRwwJzOBz1127_sorted.bam
SAMN04537142	OB-1128	BXD48	HypoTBXD48zRwwJzOBz1128	91	11388125	10355046	376617	10731663	2320322	2277369	94.24	90.93	1.85	Sample_BXD48_RwwJ-OB-1128_R1.fastq.gz	Sample_BXD48_RwwJ-OB-1128_R2.fastq.gz	HypoTBXD48zRwwJzOBz1128_sorted.bam
SAMN04537143	OB-965	BXD48	HypoTBXD48zRwwJzOBz965	92	13926688	12768317	451604	13219921	3074348	3016726	94.93	91.68	1.87	Sample_BXD48_RwwJ-OB-965_R1.fastq.gz	Sample_BXD48_RwwJ-OB-965_R2.fastq.gz	HypoTBXD48zRwwJzOBz965_sorted.bam
SAMN04537144	OB-883	BXD49	HypoTBXD49zRwwJzOBz883	93	13816548	12584913	467811	13052724	2869443	2816581	94.47	91.09	1.84	Sample_BXD49_RwwJ-OB-883_R1.fastq.gz	Sample_BXD49_RwwJ-OB-883_R2.fastq.gz	HypoTBXD49zRwwJzOBz883_sorted.bam
SAMN04537145	OB-958	BXD49	HypoTBXD49zRwwJzOBz958	94	13906119	12739163	475724	13214887	3036060	2979043	95.03	91.61	1.88	Sample_BXD49_RwwJ-OB-958_R1.fastq.gz	Sample_BXD49_RwwJ-OB-958_R2.fastq.gz	HypoTBXD49zRwwJzOBz958_sorted.bam
SAMN04537146	OB-959	BXD49	HypoTBXD49zRwwJzOBz959	95	15887559	14612229	528805	15141034	3556748	3489024	95.3	91.97	1.9	Sample_BXD49_RwwJ-OB-959_R1.fastq.gz	Sample_BXD49_RwwJ-OB-959_R2.fastq.gz	HypoTBXD49zRwwJzOBz959_sorted.bam
SAMN04537147	OB-1160	BXD50	HypoTBXD50zRwwJzOBz1160	96	12442697	11321892	413464	11735356	2681689	2631237	94.32	90.99	1.88	Sample_BXD50_RwwJ-OB-1160_R1.fastq.gz	Sample_BXD50_RwwJ-OB-1160_R2.fastq.gz	HypoTBXD50zRwwJzOBz1160_sorted.bam
SAMN04537148	OB-1161	BXD50	HypoTBXD50zRwwJzOBz1161	97	23068607	19857027	759804	20616831	4519484	4437418	89.37	86.08	1.82	Sample_BXD50_RwwJ-OB-1161_R1.fastq.gz	Sample_BXD50_RwwJ-OB-1161_R2.fastq.gz	HypoTBXD50zRwwJzOBz1161_sorted.bam
SAMN04537149	OB-1162	BXD50	HypoTBXD50zRwwJzOBz1162	98	9314794	8473119	324337	8797456	1904079	1869041	94.45	90.96	1.84	Sample_BXD50_RwwJ-OB-1162_R1.fastq.gz	Sample_BXD50_RwwJ-OB-1162_R2.fastq.gz	HypoTBXD50zRwwJzOBz1162_sorted.bam
SAMN04537150	OB-877	BXD51	HypoTBXD51zRwwJzOBz877	99	17153674	15240629	587246	15827875	3574183	3506978	92.27	88.85	1.88	Sample_BXD51_RwwJ-OB-877_R1.fastq.gz	Sample_BXD51_RwwJ-OB-877_R2.fastq.gz	HypoTBXD51zRwwJzOBz877_sorted.bam
SAMN04537151	OB-878	BXD51	HypoTBXD51zRwwJzOBz878	100	14215373	12904197	507511	13411708	2930655	2877393	94.35	90.78	1.82	Sample_BXD51_RwwJ-OB-878_R1.fastq.gz	Sample_BXD51_RwwJ-OB-878_R2.fastq.gz	HypoTBXD51zRwwJzOBz878_sorted.bam
SAMN04537152	OB-879	BXD51	HypoTBXD51zRwwJzOBz879	101	10642493	8567737	337764	8905501	1804272	1770432	83.68	80.5	1.88	Sample_BXD51_RwwJ-OB-879_R1.fastq.gz	Sample_BXD51_RwwJ-OB-879_R2.fastq.gz	HypoTBXD51zRwwJzOBz879_sorted.bam
SAMN04537153	OB-970	BXD55	HypoTBXD55zRwwJzOBz970	102	13315873	12109998	447203	12557201	2712951	2661398	94.3	90.94	1.9	Sample_BXD55_RwwJ-OB-970_R1.fastq.gz	Sample_BXD55_RwwJ-OB-970_R2.fastq.gz	HypoTBXD55zRwwJzOBz970_sorted.bam
SAMN04537154	OB-971	BXD55	HypoTBXD55zRwwJzOBz971	103	8855382	8058517	294917	8353434	1887822	1852510	94.33	91	1.87	Sample_BXD55_RwwJ-OB-971_R1.fastq.gz	Sample_BXD55_RwwJ-OB-971_R2.fastq.gz	HypoTBXD55zRwwJzOBz971_sorted.bam
SAMN04537155	OB-972	BXD55	HypoTBXD55zRwwJzOBz972	104	18884885	17123370	639562	17762932	3906260	3833937	94.06	90.67	1.85	Sample_BXD55_RwwJ-OB-972_R1.fastq.gz	Sample_BXD55_RwwJ-OB-972_R2.fastq.gz	HypoTBXD55zRwwJzOBz972_sorted.bam
SAMN04537156	OB-830	BXD56	HypoTBXD56zRwwJzOBz830	105	12790138	11486883	432705	11919588	2568623	2520527	93.19	89.81	1.87	Sample_BXD56_RwwJ-OB-830_R1.fastq.gz	Sample_BXD56_RwwJ-OB-830_R2.fastq.gz	HypoTBXD56zRwwJzOBz830_sorted.bam
SAMN04537157	OB-831	BXD56	HypoTBXD56zRwwJzOBz831	106	14393225	13143391	513290	13656681	2991074	2934367	94.88	91.32	1.9	Sample_BXD56_RwwJ-OB-831_R1.fastq.gz	Sample_BXD56_RwwJ-OB-831_R2.fastq.gz	HypoTBXD56zRwwJzOBz831_sorted.bam
SAMN04537158	OB-832	BXD56	HypoTBXD56zRwwJzOBz832	107	11425715	8628227	340240	8968467	1932910	1896055	78.49	75.52	1.91	Sample_BXD56_RwwJ-OB-832_R1.fastq.gz	Sample_BXD56_RwwJ-OB-832_R2.fastq.gz	HypoTBXD56zRwwJzOBz832_sorted.bam
SAMN04537159	OB-494	BXD-5/TyJ	HypoTBXD5zTyJzOBz494	108	15651549	13684591	502555	14187146	3221763	3161370	90.64	87.43	1.87	Sample_BXD5_TyJ-OB-494_R1.fastq.gz	Sample_BXD5_TyJ-OB-494_R2.fastq.gz	HypoTBXD5zTyJzOBz494_sorted.bam
SAMN04537160	OB-504	BXD-5/TyJ	HypoTBXD5zTyJzOBz504	109	16388994	14849094	572582	15421676	3293803	3232508	94.1	90.6	1.86	Sample_BXD5_TyJ-OB-504_R1.fastq.gz	Sample_BXD5_TyJ-OB-504_R2.fastq.gz	HypoTBXD5zTyJzOBz504_sorted.bam
SAMN04537161	OB-505	BXD-5/TyJ	HypoTBXD5zTyJzOBz505	110	11974139	10921938	422617	11344555	2483103	2436604	94.74	91.21	1.87	Sample_BXD5_TyJ-OB-505_R1.fastq.gz	Sample_BXD5_TyJ-OB-505_R2.fastq.gz	HypoTBXD5zTyJzOBz505_sorted.bam
SAMN04537162	OB-1106	BXD60	HypoTBXD60zRwwJzOBz1106	111	10572201	9438468	397569	9836037	1879042	1843839	93.04	89.28	1.87	Sample_BXD60_RwwJ-OB-1106_R1.fastq.gz	Sample_BXD60_RwwJ-OB-1106_R2.fastq.gz	HypoTBXD60zRwwJzOBz1106_sorted.bam
SAMN04537163	OB-1107	BXD60	HypoTBXD60zRwwJzOBz1107	112	9823471	8995458	324591	9320049	2119225	2078174	94.88	91.57	1.94	Sample_BXD60_RwwJ-OB-1107_R1.fastq.gz	Sample_BXD60_RwwJ-OB-1107_R2.fastq.gz	HypoTBXD60zRwwJzOBz1107_sorted.bam
SAMN04537164	OB-873	BXD60	HypoTBXD60zRwwJzOBz873	113	12764718	10714750	383271	11098021	2496457	2448079	86.94	83.94	1.94	Sample_BXD60_RwwJ-OB-873_R1.fastq.gz	Sample_BXD60_RwwJ-OB-873_R2.fastq.gz	HypoTBXD60zRwwJzOBz873_sorted.bam
SAMN04537165	OB-1144	BXD61	HypoTBXD61zRwwJzOBz1144	114	12561685	11459487	411353	11870840	2632884	2582425	94.5	91.23	1.92	Sample_BXD61_RwwJ-OB-1144_R1.fastq.gz	Sample_BXD61_RwwJ-OB-1144_R2.fastq.gz	HypoTBXD61zRwwJzOBz1144_sorted.bam
SAMN04537166	OB-1145	BXD61	HypoTBXD61zRwwJzOBz1145	115	13678788	12440337	474636	12914973	3035302	2979962	94.42	90.95	1.82	Sample_BXD61_RwwJ-OB-1145_R1.fastq.gz	Sample_BXD61_RwwJ-OB-1145_R2.fastq.gz	HypoTBXD61zRwwJzOBz1145_sorted.bam
SAMN04537167	OB-1146	BXD61	HypoTBXD61zRwwJzOBz1146	116	14334036	13040877	481416	13522293	3046389	2989295	94.34	90.98	1.87	Sample_BXD61_RwwJ-OB-1146_R1.fastq.gz	Sample_BXD61_RwwJ-OB-1146_R2.fastq.gz	HypoTBXD61zRwwJzOBz1146_sorted.bam
SAMN04537168	OB-1049	BXD62	HypoTBXD62zRwwJzOBz1049	117	9589571	8776139	321911	9098050	2167246	2122622	94.87	91.52	2.06	Sample_BXD62_RwwJ-OB-1049_R1.fastq.gz	Sample_BXD62_RwwJ-OB-1049_R2.fastq.gz	HypoTBXD62zRwwJzOBz1049_sorted.bam
SAMN04537169	OB-1050	BXD62	HypoTBXD62zRwwJzOBz1050	118	9136446	8367531	301226	8668757	2015000	1972660	94.88	91.58	2.1	Sample_BXD62_RwwJ-OB-1050_R1.fastq.gz	Sample_BXD62_RwwJ-OB-1050_R2.fastq.gz	HypoTBXD62zRwwJzOBz1050_sorted.bam
SAMN04537170	OB-1051	BXD62	HypoTBXD62zRwwJzOBz1051	119	9223380	8429011	304231	8733242	1959862	1918960	94.69	91.39	2.09	Sample_BXD62_RwwJ-OB-1051_R1.fastq.gz	Sample_BXD62_RwwJ-OB-1051_R2.fastq.gz	HypoTBXD62zRwwJzOBz1051_sorted.bam
SAMN04537171	OB-1113	BXD64	HypoTBXD64zRwwJzOBz1113	120	9526706	8668521	331382	8999903	2064060	2027563	94.47	90.99	1.77	Sample_BXD64_RwwJ-OB-1113_R1.fastq.gz	Sample_BXD64_RwwJ-OB-1113_R2.fastq.gz	HypoTBXD64zRwwJzOBz1113_sorted.bam
SAMN04537172	OB-1114	BXD64	HypoTBXD64zRwwJzOBz1114	121	9100156	8155670	283142	8438812	1890323	1854446	92.73	89.62	1.9	Sample_BXD64_RwwJ-OB-1114_R1.fastq.gz	Sample_BXD64_RwwJ-OB-1114_R2.fastq.gz	HypoTBXD64zRwwJzOBz1114_sorted.bam
SAMN04537173	OB-1187	BXD64	HypoTBXD64zRwwJzOBz1187	122	8623895	7573454	264913	7838367	1788028	1754614	90.89	87.82	1.87	Sample_BXD64_RwwJ-OB-1187_R1.fastq.gz	Sample_BXD64_RwwJ-OB-1187_R2.fastq.gz	HypoTBXD64zRwwJzOBz1187_sorted.bam
SAMN04537174	OB-896	BXD66	HypoTBXD66zRwwJzOBz896	123	13395908	12116823	450085	12566908	2829768	2777343	93.81	90.45	1.85	Sample_BXD66_RwwJ-OB-896_R1.fastq.gz	Sample_BXD66_RwwJ-OB-896_R2.fastq.gz	HypoTBXD66zRwwJzOBz896_sorted.bam
SAMN04537175	OB-897	BXD66	HypoTBXD66zRwwJzOBz897	124	14388946	13029710	496910	13526620	3008895	2954273	94.01	90.55	1.82	Sample_BXD66_RwwJ-OB-897_R1.fastq.gz	Sample_BXD66_RwwJ-OB-897_R2.fastq.gz	HypoTBXD66zRwwJzOBz897_sorted.bam
SAMN04537176	OB-941	BXD66	HypoTBXD66zRwwJzOBz941	125	9136183	8261514	309059	8570573	1962409	1926467	93.81	90.43	1.83	Sample_BXD66_RwwJ-OB-941_R1.fastq.gz	Sample_BXD66_RwwJ-OB-941_R2.fastq.gz	HypoTBXD66zRwwJzOBz941_sorted.bam
SAMN04537177	OB-977	BXD68	HypoTBXD68zRwwJzOBz977	126	8061610	7363776	262490	7626266	1733625	1700508	94.6	91.34	1.91	Sample_BXD68_RwwJ-OB-977_R1.fastq.gz	Sample_BXD68_RwwJ-OB-977_R2.fastq.gz	HypoTBXD68zRwwJzOBz977_sorted.bam
SAMN04537178	OB-978	BXD68	HypoTBXD68zRwwJzOBz978	127	8471477	7736486	276493	8012979	1761119	1727914	94.59	91.32	1.89	Sample_BXD68_RwwJ-OB-978_R1.fastq.gz	Sample_BXD68_RwwJ-OB-978_R2.fastq.gz	HypoTBXD68zRwwJzOBz978_sorted.bam
SAMN04537179	OB-979	BXD68	HypoTBXD68zRwwJzOBz979	128	10484649	9557824	342587	9900411	2160377	2119415	94.43	91.16	1.9	Sample_BXD68_RwwJ-OB-979_R1.fastq.gz	Sample_BXD68_RwwJ-OB-979_R2.fastq.gz	HypoTBXD68zRwwJzOBz979_sorted.bam
SAMN04537180	OB-291	BXD-6/TyJ	HypoTBXD6zTyJzOBz291	129	7244113	6557695	239223	6796918	1506188	1478423	93.83	90.52	1.84	Sample_BXD6_TyJ-OB-291_R1.fastq.gz	Sample_BXD6_TyJ-OB-291_R2.fastq.gz	HypoTBXD6zTyJzOBz291_sorted.bam
SAMN04537181	OB-292	BXD-6/TyJ	HypoTBXD6zTyJzOBz292	130	8270752	7430401	278868	7709269	1663123	1632002	93.21	89.84	1.87	Sample_BXD6_TyJ-OB-292_R1.fastq.gz	Sample_BXD6_TyJ-OB-292_R2.fastq.gz	HypoTBXD6zTyJzOBz292_sorted.bam
SAMN04537182	OB-1244	BXD70	HypoTBXD70zRwwJzOBz1244	131	12758305	11630281	429420	12059701	2602858	2549465	94.52	91.16	2.05	Sample_BXD70_RwwJ-OB-1244_R1.fastq.gz	Sample_BXD70_RwwJ-OB-1244_R2.fastq.gz	HypoTBXD70zRwwJzOBz1244_sorted.bam
SAMN04537183	OB-1245	BXD70	HypoTBXD70zRwwJzOBz1245	132	13379567	12189059	448704	12637763	2796319	2738446	94.46	91.1	2.07	Sample_BXD70_RwwJ-OB-1245_R1.fastq.gz	Sample_BXD70_RwwJ-OB-1245_R2.fastq.gz	HypoTBXD70zRwwJzOBz1245_sorted.bam
SAMN04537184	OB-1246	BXD70	HypoTBXD70zRwwJzOBz1246	133	8706590	7973457	287446	8260903	1862661	1822841	94.88	91.58	2.14	Sample_BXD70_RwwJ-OB-1246_R1.fastq.gz	Sample_BXD70_RwwJ-OB-1246_R2.fastq.gz	HypoTBXD70zRwwJzOBz1246_sorted.bam
SAMN04537185	OB-891	BXD71	HypoTBXD71zRwwJzOBz891	134	14046651	12779708	482602	13262310	2903872	2848525	94.42	90.98	1.91	Sample_BXD71_RwwJ-OB-891_R1.fastq.gz	Sample_BXD71_RwwJ-OB-891_R2.fastq.gz	HypoTBXD71zRwwJzOBz891_sorted.bam
SAMN04537186	OB-921	BXD71	HypoTBXD71zRwwJzOBz921	135	15650312	14297635	534175	14831810	3239655	3178230	94.77	91.36	1.9	Sample_BXD71_RwwJ-OB-921_R1.fastq.gz	Sample_BXD71_RwwJ-OB-921_R2.fastq.gz	HypoTBXD71zRwwJzOBz921_sorted.bam
SAMN04537187	OB-922	BXD71	HypoTBXD71zRwwJzOBz922	136	14625646	13349988	509654	13859642	3073937	3014863	94.76	91.28	1.92	Sample_BXD71_RwwJ-OB-922_R1.fastq.gz	Sample_BXD71_RwwJ-OB-922_R2.fastq.gz	HypoTBXD71zRwwJzOBz922_sorted.bam
SAMN04537188	OB-1262	BXD73	HypoTBXD73zRwwJzOBz1262	137	12140564	10971959	403831	11375790	2400788	2355458	93.7	90.37	1.89	Sample_BXD73_RwwJ-OB-1262_R1.fastq.gz	Sample_BXD73_RwwJ-OB-1262_R2.fastq.gz	HypoTBXD73zRwwJzOBz1262_sorted.bam
SAMN04537189	OB-1263	BXD73	HypoTBXD73zRwwJzOBz1263	138	15685996	14158937	544627	14703564	3083889	3025974	93.74	90.26	1.88	Sample_BXD73_RwwJ-OB-1263_R1.fastq.gz	Sample_BXD73_RwwJ-OB-1263_R2.fastq.gz	HypoTBXD73zRwwJzOBz1263_sorted.bam
SAMN04537190	OB-1264	BXD73	HypoTBXD73zRwwJzOBz1264	139	15061119	13623535	534927	14158462	3062454	3004877	94.01	90.45	1.88	Sample_BXD73_RwwJ-OB-1264_R1.fastq.gz	Sample_BXD73_RwwJ-OB-1264_R2.fastq.gz	HypoTBXD73zRwwJzOBz1264_sorted.bam
SAMN04537191	OB-1071	BXD74	HypoTBXD74zRwwJzOBz1071	140	17887629	16336054	592162	16928216	3691788	3623449	94.64	91.33	1.85	Sample_BXD74_RwwJ-OB-1071_R1.fastq.gz	Sample_BXD74_RwwJ-OB-1071_R2.fastq.gz	HypoTBXD74zRwwJzOBz1071_sorted.bam
SAMN04537192	OB-1120	BXD74	HypoTBXD74zRwwJzOBz1120	141	8817257	8068566	286952	8355518	1848347	1813475	94.76	91.51	1.89	Sample_BXD74_RwwJ-OB-1120_R1.fastq.gz	Sample_BXD74_RwwJ-OB-1120_R2.fastq.gz	HypoTBXD74zRwwJzOBz1120_sorted.bam
SAMN04537193	OB-1121	BXD74	HypoTBXD74zRwwJzOBz1121	142	12742858	11721990	436014	12158004	2786061	2734207	95.41	91.99	1.86	Sample_BXD74_RwwJ-OB-1121_R1.fastq.gz	Sample_BXD74_RwwJ-OB-1121_R2.fastq.gz	HypoTBXD74zRwwJzOBz1121_sorted.bam
SAMN04537194	OB-1013	BXD75	HypoTBXD75zRwwJzOBz1013	143	13946699	11859482	429221	12288703	2858682	2798667	88.11	85.03	2.1	Sample_BXD75_RwwJ-OB-1013_R1.fastq.gz	Sample_BXD75_RwwJ-OB-1013_R2.fastq.gz	HypoTBXD75zRwwJzOBz1013_sorted.bam
SAMN04537195	OB-1014	BXD75	HypoTBXD75zRwwJzOBz1014	144	8659272	7842846	290029	8132875	1774045	1737477	93.92	90.57	2.06	Sample_BXD75_RwwJ-OB-1014_R1.fastq.gz	Sample_BXD75_RwwJ-OB-1014_R2.fastq.gz	HypoTBXD75zRwwJzOBz1014_sorted.bam
SAMN04537196	OB-1080	BXD75	HypoTBXD75zRwwJzOBz1080	145	10735321	9761266	351945	10113211	2318906	2270260	94.21	90.93	2.1	Sample_BXD75_RwwJ-OB-1080_R1.fastq.gz	Sample_BXD75_RwwJ-OB-1080_R2.fastq.gz	HypoTBXD75zRwwJzOBz1080_sorted.bam
SAMN04537197	OB-1041	BXD79	HypoTBXD79zRwwJzOBz1041	146	17237249	15558476	619203	16177679	3761606	3695535	93.85	90.26	1.76	Sample_BXD79_RwwJ-OB-1041_R1.fastq.gz	Sample_BXD79_RwwJ-OB-1041_R2.fastq.gz	HypoTBXD79zRwwJzOBz1041_sorted.bam
SAMN04537198	OB-928	BXD79	HypoTBXD79zRwwJzOBz928	147	16955196	15507558	569691	16077249	3611905	3544858	94.82	91.46	1.86	Sample_BXD79_RwwJ-OB-928_R1.fastq.gz	Sample_BXD79_RwwJ-OB-928_R2.fastq.gz	HypoTBXD79zRwwJzOBz928_sorted.bam
SAMN04537199	OB-929	BXD79	HypoTBXD79zRwwJzOBz929	148	10420080	9478947	350748	9829695	2136100	2095518	94.33	90.97	1.9	Sample_BXD79_RwwJ-OB-929_R1.fastq.gz	Sample_BXD79_RwwJ-OB-929_R2.fastq.gz	HypoTBXD79zRwwJzOBz929_sorted.bam
SAMN04537200	OB-1155	BXD84	HypoTBXD84zRwwJzOBz1155	149	14050759	12866417	470202	13336619	3066929	3009671	94.92	91.57	1.87	Sample_BXD84_RwwJ-OB-1155_R1.fastq.gz	Sample_BXD84_RwwJ-OB-1155_R2.fastq.gz	HypoTBXD84zRwwJzOBz1155_sorted.bam
SAMN04537201	OB-1168	BXD84	HypoTBXD84zRwwJzOBz1168	150	11099235	10050966	375205	10426171	2281320	2239022	93.94	90.56	1.85	Sample_BXD84_RwwJ-OB-1168_R1.fastq.gz	Sample_BXD84_RwwJ-OB-1168_R2.fastq.gz	HypoTBXD84zRwwJzOBz1168_sorted.bam
SAMN04537202	OB-1169	BXD84	HypoTBXD84zRwwJzOBz1169	151	15931619	14569672	578183	15147855	3464501	3400581	95.08	91.45	1.84	Sample_BXD84_RwwJ-OB-1169_R1.fastq.gz	Sample_BXD84_RwwJ-OB-1169_R2.fastq.gz	HypoTBXD84zRwwJzOBz1169_sorted.bam
SAMN04537203	OB-1196	BXD85	HypoTBXD85zRwwJzOBz1196	152	9059201	8252235	308920	8561155	1912304	1872979	94.5	91.09	2.06	Sample_BXD85_RwwJ-OB-1196_R1.fastq.gz	Sample_BXD85_RwwJ-OB-1196_R2.fastq.gz	HypoTBXD85zRwwJzOBz1196_sorted.bam
SAMN04537204	OB-1197	BXD85	HypoTBXD85zRwwJzOBz1197	153	9012914	8266572	294151	8560723	1939035	1897058	94.98	91.72	2.16	Sample_BXD85_RwwJ-OB-1197_R1.fastq.gz	Sample_BXD85_RwwJ-OB-1197_R2.fastq.gz	HypoTBXD85zRwwJzOBz1197_sorted.bam
SAMN04537205	OB-1198	BXD85	HypoTBXD85zRwwJzOBz1198	154	12704109	11625334	422361	12047695	2744917	2687624	94.83	91.51	2.09	Sample_BXD85_RwwJ-OB-1198_R1.fastq.gz	Sample_BXD85_RwwJ-OB-1198_R2.fastq.gz	HypoTBXD85zRwwJzOBz1198_sorted.bam
SAMN04537206	OB-1319	BXD86	HypoTBXD86zRwwJzOBz1319	155	14609595	13351842	482154	13833996	3104570	3045404	94.69	91.39	1.91	Sample_BXD86_RwwJ-OB-1319_R1.fastq.gz	Sample_BXD86_RwwJ-OB-1319_R2.fastq.gz	HypoTBXD86zRwwJzOBz1319_sorted.bam
SAMN04537207	OB-1320	BXD86	HypoTBXD86zRwwJzOBz1320	156	12763560	11600737	424213	12024950	2680237	2629430	94.21	90.89	1.9	Sample_BXD86_RwwJ-OB-1320_R1.fastq.gz	Sample_BXD86_RwwJ-OB-1320_R2.fastq.gz	HypoTBXD86zRwwJzOBz1320_sorted.bam
SAMN04537208	OB-1321	BXD86	HypoTBXD86zRwwJzOBz1321	157	12721140	11507859	427324	11935183	2521102	2474040	93.82	90.46	1.87	Sample_BXD86_RwwJ-OB-1321_R1.fastq.gz	Sample_BXD86_RwwJ-OB-1321_R2.fastq.gz	HypoTBXD86zRwwJzOBz1321_sorted.bam
SAMN04537209	OB-995	BXD87	HypoTBXD87zRwwJzOBz995	158	14268353	12246432	443000	12689432	2807378	2753839	88.93	85.83	1.91	Sample_BXD87_RwwJ-OB-995_R1.fastq.gz	Sample_BXD87_RwwJ-OB-995_R2.fastq.gz	HypoTBXD87zRwwJzOBz995_sorted.bam
SAMN04537210	OB-996	BXD87	HypoTBXD87zRwwJzOBz996	159	15875784	14394906	540164	14935070	3157117	3098145	94.07	90.67	1.87	Sample_BXD87_RwwJ-OB-996_R1.fastq.gz	Sample_BXD87_RwwJ-OB-996_R2.fastq.gz	HypoTBXD87zRwwJzOBz996_sorted.bam
SAMN04537211	OB-997	BXD87	HypoTBXD87zRwwJzOBz997	160	8850052	8101150	301866	8403016	1881936	1842360	94.95	91.54	2.1	Sample_BXD87_RwwJ-OB-997_R1.fastq.gz	Sample_BXD87_RwwJ-OB-997_R2.fastq.gz	HypoTBXD87zRwwJzOBz997_sorted.bam
SAMN04537212	OB-297	BXD-9/TyJ	HypoTBXD9zTyJzOBz297	161	13836507	12559526	448609	13008135	3078619	3014588	94.01	90.77	2.08	Sample_BXD9_TyJ-OB-297_R1.fastq.gz	Sample_BXD9_TyJ-OB-297_R2.fastq.gz	HypoTBXD9zTyJzOBz297_sorted.bam
SAMN04537213	OB-298	BXD-9/TyJ	HypoTBXD9zTyJzOBz298	162	13053161	11972753	425452	12398205	2909284	2849663	94.98	91.72	2.05	Sample_BXD9_TyJ-OB-298_R1.fastq.gz	Sample_BXD9_TyJ-OB-298_R2.fastq.gz	HypoTBXD9zTyJzOBz298_sorted.bam
SAMN04537214	OB-299	BXD-9/TyJ	HypoTBXD9zTyJzOBz299	163	6639927	6064662	219385	6284047	1430686	1401989	94.64	91.34	2.01	Sample_BXD9_TyJ-OB-299_R1.fastq.gz	Sample_BXD9_TyJ-OB-299_R2.fastq.gz	HypoTBXD9zTyJzOBz299_sorted.bam
SAMN04537215	OB-532	BXH-19/TyJ	HypoTBXH19zTyJzOBz532	164	10751000	9769165	359935	10129100	2207634	2166199	94.22	90.87	1.88	Sample_BXH19_TyJ-OB-532_R1.fastq.gz	Sample_BXH19_TyJ-OB-532_R2.fastq.gz	HypoTBXH19zTyJzOBz532_sorted.bam
SAMN04537216	OB-533	BXH-19/TyJ	HypoTBXH19zTyJzOBz533	165	18254630	16661835	643775	17305610	3697988	3629600	94.8	91.27	1.85	Sample_BXH19_TyJ-OB-533_R1.fastq.gz	Sample_BXH19_TyJ-OB-533_R2.fastq.gz	HypoTBXH19zTyJzOBz533_sorted.bam
SAMN04537217	OB-534	BXHA1	HypoTBXH20zKccJzOBz534	166	7610343	6890652	250862	7141514	1626084	1591797	93.84	90.54	2.11	Sample_BXH20_KccJ-OB-534_R1.fastq.gz	Sample_BXH20_KccJ-OB-534_R2.fastq.gz	HypoTBXH20zKccJzOBz534_sorted.bam
SAMN04537218	OB-535	BXHA1	HypoTBXH20zKccJzOBz535	167	7754523	7072585	257938	7330523	1674854	1639605	94.53	91.21	2.1	Sample_BXH20_KccJ-OB-535_R1.fastq.gz	Sample_BXH20_KccJ-OB-535_R2.fastq.gz	HypoTBXH20zKccJzOBz535_sorted.bam
SAMN04537219	OB-457	BXHB2	HypoTBXH22zKccJzOBz457	168	12512625	11308754	415858	11724612	2494432	2446949	93.7	90.38	1.9	Sample_BXH22_KccJ-OB-457_R1.fastq.gz	Sample_BXH22_KccJ-OB-457_R2.fastq.gz	HypoTBXH22zKccJzOBz457_sorted.bam
SAMN04537220	OB-458	BXHB2	HypoTBXH22zKccJzOBz458	169	15986771	13912002	522036	14434038	3094653	3035066	90.29	87.02	1.93	Sample_BXH22_KccJ-OB-458_R1.fastq.gz	Sample_BXH22_KccJ-OB-458_R2.fastq.gz	HypoTBXH22zKccJzOBz458_sorted.bam
SAMN04537221	OB-483	BXHB2	HypoTBXH22zKccJzOBz483	170	15340643	14041424	532083	14573507	3400583	3336930	95	91.53	1.87	Sample_BXH22_KccJ-OB-483_R1.fastq.gz	Sample_BXH22_KccJ-OB-483_R2.fastq.gz	HypoTBXH22zKccJzOBz483_sorted.bam
SAMN04537222	OB-365	BXH-4/TyJ	HypoTBXH4zTyJzOBz365	171	8404087	7700076	283306	7983382	1801545	1767773	94.99	91.62	1.87	Sample_BXH4_TyJ-OB-365_R1.fastq.gz	Sample_BXH4_TyJ-OB-365_R2.fastq.gz	HypoTBXH4zTyJzOBz365_sorted.bam
SAMN04537223	OB-366	BXH-4/TyJ	HypoTBXH4zTyJzOBz366	172	9813479	8909125	325713	9234838	2108799	2069873	94.1	90.78	1.85	Sample_BXH4_TyJ-OB-366_R1.fastq.gz	Sample_BXH4_TyJ-OB-366_R2.fastq.gz	HypoTBXH4zTyJzOBz366_sorted.bam
SAMN04537224	OB-367	BXH-4/TyJ	HypoTBXH4zTyJzOBz367	173	8087310	7404204	260585	7664789	1767058	1734099	94.78	91.55	1.87	Sample_BXH4_TyJ-OB-367_R1.fastq.gz	Sample_BXH4_TyJ-OB-367_R2.fastq.gz	HypoTBXH4zTyJzOBz367_sorted.bam
SAMN04537225	OB-321	BXH-6/TyJ	HypoTBXH6zTyJzOBz321	174	16392058	15120643	545678	15666321	3605279	3537271	95.57	92.24	1.89	Sample_BXH6_TyJ-OB-321_R1.fastq.gz	Sample_BXH6_TyJ-OB-321_R2.fastq.gz	HypoTBXH6zTyJzOBz321_sorted.bam
SAMN04537226	OB-322	BXH-6/TyJ	HypoTBXH6zTyJzOBz322	175	16686999	15210605	570907	15781512	3430687	3365495	94.57	91.15	1.9	Sample_BXH6_TyJ-OB-322_R1.fastq.gz	Sample_BXH6_TyJ-OB-322_R2.fastq.gz	HypoTBXH6zTyJzOBz322_sorted.bam
SAMN04537227	OB-323	BXH-6/TyJ	HypoTBXH6zTyJzOBz323	176	19231950	17675632	628638	18304270	4127019	4049639	95.18	91.91	1.87	Sample_BXH6_TyJ-OB-323_R1.fastq.gz	Sample_BXH6_TyJ-OB-323_R2.fastq.gz	HypoTBXH6zTyJzOBz323_sorted.bam
SAMN04537228	OB-751	BXH-9/TyJ	HypoTBXH9zTyJzOBz751	177	20242773	18393517	722399	19115916	4092285	4018501	94.43	90.86	1.8	Sample_BXH9_TyJ-OB-751_R1.fastq.gz	Sample_BXH9_TyJ-OB-751_R2.fastq.gz	HypoTBXH9zTyJzOBz751_sorted.bam
SAMN04537229	OB-752	BXH-9/TyJ	HypoTBXH9zTyJzOBz752	178	14609034	12912671	512434	13425105	2828335	2777160	91.9	88.39	1.81	Sample_BXH9_TyJ-OB-752_R1.fastq.gz	Sample_BXH9_TyJ-OB-752_R2.fastq.gz	HypoTBXH9zTyJzOBz752_sorted.bam
SAMN04537230	OB-753	BXH-9/TyJ	HypoTBXH9zTyJzOBz753	179	12028445	10967604	448598	11416202	2540348	2494223	94.91	91.18	1.82	Sample_BXH9_TyJ-OB-753_R1.fastq.gz	Sample_BXH9_TyJ-OB-753_R2.fastq.gz	HypoTBXH9zTyJzOBz753_sorted.bam
SAMN04537231	OB-64	C3H/HeJ	HypoTC3HzHeJzOBz64	180	12992758	11326778	416988	11743766	2611321	2562588	90.39	87.18	1.87	Sample_C3H_HeJ-OB-64_R1.fastq.gz	Sample_C3H_HeJ-OB-64_R2.fastq.gz	HypoTC3HzHeJzOBz64_sorted.bam
SAMN04537232	OB-65	C3H/HeJ	HypoTC3HzHeJzOBz65	181	10701883	9743757	378900	10122657	2262076	2221193	94.59	91.05	1.81	Sample_C3H_HeJ-OB-65_R1.fastq.gz	Sample_C3H_HeJ-OB-65_R2.fastq.gz	HypoTC3HzHeJzOBz65_sorted.bam
SAMN04537233	OB-66	C3H/HeJ	HypoTC3HzHeJzOBz66	182	14158920	12818055	506496	13324551	2981058	2927619	94.11	90.53	1.79	Sample_C3H_HeJ-OB-66_R1.fastq.gz	Sample_C3H_HeJ-OB-66_R2.fastq.gz	HypoTC3HzHeJzOBz66_sorted.bam
SAMN04537234	OB-83	C57BLKS/J	HypoTC57BLKSzJzOBz83	183	16986021	15464567	578880	16043447	3537812	3471832	94.45	91.04	1.86	Sample_C57BLKS_J-OB-83_R1.fastq.gz	Sample_C57BLKS_J-OB-83_R2.fastq.gz	HypoTC57BLKSzJzOBz83_sorted.bam
SAMN04537235	OB-84	C57BLKS/J	HypoTC57BLKSzJzOBz84	184	12269435	11269114	412732	11681846	2624313	2574628	95.21	91.85	1.89	Sample_C57BLKS_J-OB-84_R1.fastq.gz	Sample_C57BLKS_J-OB-84_R2.fastq.gz	HypoTC57BLKSzJzOBz84_sorted.bam
SAMN04537236	OB-85	C57BLKS/J	HypoTC57BLKSzJzOBz85	185	12801849	11684672	444900	12129572	2771231	2719301	94.75	91.27	1.87	Sample_C57BLKS_J-OB-85_R1.fastq.gz	Sample_C57BLKS_J-OB-85_R2.fastq.gz	HypoTC57BLKSzJzOBz85_sorted.bam
SAMN04537237	OB-605	C57BL/6J	HypoTC57BLz6JzOBz605	186	14201265	13013442	469646	13483088	3086018	3026351	94.94	91.64	1.93	Sample_C57BL_6J-OB-605_R1.fastq.gz	Sample_C57BL_6J-OB-605_R2.fastq.gz	HypoTC57BLz6JzOBz605_sorted.bam
SAMN04537238	OB-606	C57BL/6J	HypoTC57BLz6JzOBz606	187	8862301	8101030	281425	8382455	1894074	1858148	94.59	91.41	1.9	Sample_C57BL_6J-OB-606_R1.fastq.gz	Sample_C57BL_6J-OB-606_R2.fastq.gz	HypoTC57BLz6JzOBz606_sorted.bam
SAMN04537239	OB-607	C57BL/6J	HypoTC57BLz6JzOBz607	188	12654721	11476320	397373	11873693	2662682	2611601	93.83	90.69	1.92	Sample_C57BL_6J-OB-607_R1.fastq.gz	Sample_C57BL_6J-OB-607_R2.fastq.gz	HypoTC57BLz6JzOBz607_sorted.bam
SAMN04537240	OB-491	C57L/J	HypoTC57LzJzOBz491	189	9135159	8143458	289773	8433231	1804254	1768930	92.32	89.14	1.96	Sample_C57L_J-OB-491_R1.fastq.gz	Sample_C57L_J-OB-491_R2.fastq.gz	HypoTC57LzJzOBz491_sorted.bam
SAMN04537241	OB-492	C57L/J	HypoTC57LzJzOBz492	190	15136319	13839631	513267	14352898	3130728	3071840	94.82	91.43	1.88	Sample_C57L_J-OB-492_R1.fastq.gz	Sample_C57L_J-OB-492_R2.fastq.gz	HypoTC57LzJzOBz492_sorted.bam
SAMN04537242	OB-493	C57L/J	HypoTC57LzJzOBz493	191	15506856	14198530	521035	14719565	3176126	3114439	94.92	91.56	1.94	Sample_C57L_J-OB-493_R1.fastq.gz	Sample_C57L_J-OB-493_R2.fastq.gz	HypoTC57LzJzOBz493_sorted.bam
SAMN04537243	OB-260	CBA/J	HypoTCBAzJzOBz260	192	6253452	5731770	192470	5924240	1323316	1297624	94.74	91.66	1.94	Sample_CBA_J-OB-260_R1.fastq.gz	Sample_CBA_J-OB-260_R2.fastq.gz	HypoTCBAzJzOBz260_sorted.bam
SAMN04537244	OB-261	CBA/J	HypoTCBAzJzOBz261	193	8072772	7420935	251095	7672030	1729318	1696066	95.04	91.93	1.92	Sample_CBA_J-OB-261_R1.fastq.gz	Sample_CBA_J-OB-261_R2.fastq.gz	HypoTCBAzJzOBz261_sorted.bam
SAMN04537245	OB-691	CBA/J	HypoTCBAzJzOBz691	194	13056095	11922035	448374	12370409	2756603	2705910	94.75	91.31	1.84	Sample_CBA_J-OB-691_R1.fastq.gz	Sample_CBA_J-OB-691_R2.fastq.gz	HypoTCBAzJzOBz691_sorted.bam
SAMN04537246	OB-1341	CE/J	HypoTCEzJzOBz1341	195	14874821	13666181	468784	14134965	3224973	3161935	95.03	91.87	1.95	Sample_CE_J-OB-1341_R1.fastq.gz	Sample_CE_J-OB-1341_R2.fastq.gz	HypoTCEzJzOBz1341_sorted.bam
SAMN04537247	OB-1342	CE/J	HypoTCEzJzOBz1342	196	16902835	15583277	541610	16124887	3690880	3620393	95.4	92.19	1.91	Sample_CE_J-OB-1342_R1.fastq.gz	Sample_CE_J-OB-1342_R2.fastq.gz	HypoTCEzJzOBz1342_sorted.bam
SAMN04537248	OB-1343	CE/J	HypoTCEzJzOBz1343	197	17057614	15688205	536560	16224765	3723936	3651392	95.12	91.97	1.95	Sample_CE_J-OB-1343_R1.fastq.gz	Sample_CE_J-OB-1343_R2.fastq.gz	HypoTCEzJzOBz1343_sorted.bam
SAMN04537249	OB-187	CXB-11/HiAJ	HypoTCXB11zHiAJzOBz187	198	20945187	19212914	696941	19909855	4550664	4465701	95.06	91.73	1.87	Sample_CXB11_HiAJ-OB-187_R1.fastq.gz	Sample_CXB11_HiAJ-OB-187_R2.fastq.gz	HypoTCXB11zHiAJzOBz187_sorted.bam
SAMN04537250	OB-267	CXB-11/HiAJ	HypoTCXB11zHiAJzOBz267	199	17430388	15923235	604109	16527344	3521321	3458170	94.82	91.35	1.79	Sample_CXB11_HiAJ-OB-267_R1.fastq.gz	Sample_CXB11_HiAJ-OB-267_R2.fastq.gz	HypoTCXB11zHiAJzOBz267_sorted.bam
SAMN04537251	OB-268	CXB-11/HiAJ	HypoTCXB11zHiAJzOBz268	200	18400753	16783376	612431	17395807	3790275	3719546	94.54	91.21	1.87	Sample_CXB11_HiAJ-OB-268_R1.fastq.gz	Sample_CXB11_HiAJ-OB-268_R2.fastq.gz	HypoTCXB11zHiAJzOBz268_sorted.bam
SAMN04537252	OB-452	CXB-12/HiAJ	HypoTCXB12zHiAJzOBz452	201	8829282	8115774	278314	8394088	1880272	1843988	95.07	91.92	1.93	Sample_CXB12_HiAJ-OB-452_R1.fastq.gz	Sample_CXB12_HiAJ-OB-452_R2.fastq.gz	HypoTCXB12zHiAJzOBz452_sorted.bam
SAMN04537253	OB-680	CXB-12/HiAJ	HypoTCXB12zHiAJzOBz680	202	11564705	10550381	404279	10954660	2405454	2360495	94.72	91.23	1.87	Sample_CXB12_HiAJ-OB-680_R1.fastq.gz	Sample_CXB12_HiAJ-OB-680_R2.fastq.gz	HypoTCXB12zHiAJzOBz680_sorted.bam
SAMN04537254	OB-681	CXB-12/HiAJ	HypoTCXB12zHiAJzOBz681	203	11369099	10355645	404954	10760599	2326574	2283892	94.65	91.09	1.83	Sample_CXB12_HiAJ-OB-681_R1.fastq.gz	Sample_CXB12_HiAJ-OB-681_R2.fastq.gz	HypoTCXB12zHiAJzOBz681_sorted.bam
SAMN04537255	OB-224	CXB-13/HiAJ	HypoTCXB13zHiAJzOBz224	204	19542263	17798711	682443	18481154	4222271	4146080	94.57	91.08	1.8	Sample_CXB13_HiAJ-OB-224_R1.fastq.gz	Sample_CXB13_HiAJ-OB-224_R2.fastq.gz	HypoTCXB13zHiAJzOBz224_sorted.bam
SAMN04537256	OB-225	CXB-13/HiAJ	HypoTCXB13zHiAJzOBz225	205	20300870	18479939	693244	19173183	4262723	4184614	94.45	91.03	1.83	Sample_CXB13_HiAJ-OB-225_R1.fastq.gz	Sample_CXB13_HiAJ-OB-225_R2.fastq.gz	HypoTCXB13zHiAJzOBz225_sorted.bam
SAMN04537257	OB-812	CXB-13/HiAJ	HypoTCXB13zHiAJzOBz812	206	21221455	19270141	711514	19981655	4393759	4311258	94.16	90.8	1.88	Sample_CXB13_HiAJ-OB-812_R1.fastq.gz	Sample_CXB13_HiAJ-OB-812_R2.fastq.gz	HypoTCXB13zHiAJzOBz812_sorted.bam
SAMN04537258	OB-420	CXB-3/ByJ	HypoTCXB3zByJzOBz420	207	10592002	9581334	334221	9915555	2150242	2108612	93.61	90.46	1.94	Sample_CXB3_ByJ-OB-420_R1.fastq.gz	Sample_CXB3_ByJ-OB-420_R2.fastq.gz	HypoTCXB3zByJzOBz420_sorted.bam
SAMN04537259	OB-421	CXB-3/ByJ	HypoTCXB3zByJzOBz421	208	10818918	9772836	354722	10127558	2151732	2109984	93.61	90.33	1.94	Sample_CXB3_ByJ-OB-421_R1.fastq.gz	Sample_CXB3_ByJ-OB-421_R2.fastq.gz	HypoTCXB3zByJzOBz421_sorted.bam
SAMN04537260	OB-422	CXB-3/ByJ	HypoTCXB3zByJzOBz422	209	12994322	11162820	590920	11753740	2263605	2226860	90.45	85.91	1.62	Sample_CXB3_ByJ-OB-422_R1.fastq.gz	Sample_CXB3_ByJ-OB-422_R2.fastq.gz	HypoTCXB3zByJzOBz422_sorted.bam
SAMN04537261	OB-287	CXBH	HypoTCXB4zByJzOBz287	210	11621745	10717675	365307	11082982	2447255	2399195	95.36	92.22	1.96	Sample_CXB4_ByJ-OB-287_R1.fastq.gz	Sample_CXB4_ByJ-OB-287_R2.fastq.gz	HypoTCXB4zByJzOBz287_sorted.bam
SAMN04537262	OB-653	CXBH	HypoTCXB4zByJzOBz653	211	10720326	9856713	351070	10207783	2252707	2209875	95.22	91.94	1.9	Sample_CXB4_ByJ-OB-653_R1.fastq.gz	Sample_CXB4_ByJ-OB-653_R2.fastq.gz	HypoTCXB4zByJzOBz653_sorted.bam
SAMN04537263	OB-654	CXBH	HypoTCXB4zByJzOBz654	212	9658607	8891909	321877	9213786	2063102	2024224	95.39	92.06	1.88	Sample_CXB4_ByJ-OB-654_R1.fastq.gz	Sample_CXB4_ByJ-OB-654_R2.fastq.gz	HypoTCXB4zByJzOBz654_sorted.bam
SAMN04537264	OB-272	CXB-6/ByJ	HypoTCXB6zByJzOBz272	213	13637213	12539577	486164	13025741	3108288	3050783	95.52	91.95	1.85	Sample_CXB6_ByJ-OB-272_R1.fastq.gz	Sample_CXB6_ByJ-OB-272_R2.fastq.gz	HypoTCXB6zByJzOBz272_sorted.bam
SAMN04537265	OB-273	CXB-6/ByJ	HypoTCXB6zByJzOBz273	214	15491157	14143470	533821	14677291	3377479	3315054	94.75	91.3	1.85	Sample_CXB6_ByJ-OB-273_R1.fastq.gz	Sample_CXB6_ByJ-OB-273_R2.fastq.gz	HypoTCXB6zByJzOBz273_sorted.bam
SAMN04537266	OB-274	CXB-6/ByJ	HypoTCXB6zByJzOBz274	215	20393609	18701390	663967	19365357	4327992	4245672	94.96	91.7	1.9	Sample_CXB6_ByJ-OB-274_R1.fastq.gz	Sample_CXB6_ByJ-OB-274_R2.fastq.gz	HypoTCXB6zByJzOBz274_sorted.bam
SAMN04537267	OB-676	CXB-7/ByJ	HypoTCXB7zByJzOBz676	216	12821703	11714810	428651	12143461	2714781	2663480	94.71	91.37	1.89	Sample_CXB7_ByJ-OB-676_R1.fastq.gz	Sample_CXB7_ByJ-OB-676_R2.fastq.gz	HypoTCXB7zByJzOBz676_sorted.bam
SAMN04537268	OB-677	CXB-7/ByJ	HypoTCXB7zByJzOBz677	217	14789724	13475957	509084	13985041	2968021	2911022	94.56	91.12	1.92	Sample_CXB7_ByJ-OB-677_R1.fastq.gz	Sample_CXB7_ByJ-OB-677_R2.fastq.gz	HypoTCXB7zByJzOBz677_sorted.bam
SAMN04537269	OB-678	CXB-7/ByJ	HypoTCXB7zByJzOBz678	218	15247618	13518789	498896	14017685	3147236	3087157	91.93	88.66	1.91	Sample_CXB7_ByJ-OB-678_R1.fastq.gz	Sample_CXB7_ByJ-OB-678_R2.fastq.gz	HypoTCXB7zByJzOBz678_sorted.bam
SAMN04537270	OB-599	DBA/2J	HypoTDBAz2JzOBz599	219	12739830	11490051	442678	11932729	2461673	2416442	93.66	90.19	1.84	Sample_DBA_2J-OB-599_R1.fastq.gz	Sample_DBA_2J-OB-599_R2.fastq.gz	HypoTDBAz2JzOBz599_sorted.bam
SAMN04537271	OB-600	DBA/2J	HypoTDBAz2JzOBz600	220	13425326	12175480	477268	12652748	2665165	2616027	94.25	90.69	1.84	Sample_DBA_2J-OB-600_R1.fastq.gz	Sample_DBA_2J-OB-600_R2.fastq.gz	HypoTDBAz2JzOBz600_sorted.bam
SAMN04537272	OB-601	DBA/2J	HypoTDBAz2JzOBz601	221	14687868	13254830	527006	13781836	2843964	2791750	93.83	90.24	1.84	Sample_DBA_2J-OB-601_R1.fastq.gz	Sample_DBA_2J-OB-601_R2.fastq.gz	HypoTDBAz2JzOBz601_sorted.bam
SAMN04537273	OB-1452	I/LnJ	HypoTIzLnJzOBz1452	222	11219576	10162576	355321	10517897	2453137	2407025	93.75	90.58	1.88	Sample_I_LnJ-OB-1452_R1.fastq.gz	Sample_I_LnJ-OB-1452_R2.fastq.gz	HypoTIzLnJzOBz1452_sorted.bam
SAMN04537274	OB-109	KK/HlJ	HypoTKKzHlJzOBz109	223	9934121	8937441	331855	9269296	2144078	2104167	93.31	89.97	1.86	Sample_KK_HlJ-OB-109_R1.fastq.gz	Sample_KK_HlJ-OB-109_R2.fastq.gz	HypoTKKzHlJzOBz109_sorted.bam
SAMN04537275	OB-110	KK/HlJ	HypoTKKzHlJzOBz110	224	9073559	8215953	316399	8532352	1919206	1883726	94.04	90.55	1.85	Sample_KK_HlJ-OB-110_R1.fastq.gz	Sample_KK_HlJ-OB-110_R2.fastq.gz	HypoTKKzHlJzOBz110_sorted.bam
SAMN04537276	OB-1308	KK/HlJ	HypoTKKzHlJzOBz1308	225	9791833	8919751	328371	9248122	2113604	2073663	94.45	91.09	1.89	Sample_KK_HlJ-OB-1308_R1.fastq.gz	Sample_KK_HlJ-OB-1308_R2.fastq.gz	HypoTKKzHlJzOBz1308_sorted.bam
SAMN04537277	OB-317	LG/J	HypoTLGzJzOBz317	226	12091045	11114254	387820	11502074	2606210	2556311	95.13	91.92	1.91	Sample_LG_J-OB-317_R1.fastq.gz	Sample_LG_J-OB-317_R2.fastq.gz	HypoTLGzJzOBz317_sorted.bam
SAMN04537278	OB-318	LG/J	HypoTLGzJzOBz318	227	13086446	12056744	428205	12484949	2830191	2774775	95.4	92.13	1.96	Sample_LG_J-OB-318_R1.fastq.gz	Sample_LG_J-OB-318_R2.fastq.gz	HypoTLGzJzOBz318_sorted.bam
SAMN04537279	OB-319	LG/J	HypoTLGzJzOBz319	228	15844216	14609110	519028	15128138	3321945	3258302	95.48	92.2	1.92	Sample_LG_J-OB-319_R1.fastq.gz	Sample_LG_J-OB-319_R2.fastq.gz	HypoTLGzJzOBz319_sorted.bam
SAMN04537280	OB-635	MA/MyJ	HypoTMAzMyJzOBz635	229	20772539	19123836	703832	19827668	4591877	4506132	95.45	92.06	1.87	Sample_MA_MyJ-OB-635_R1.fastq.gz	Sample_MA_MyJ-OB-635_R2.fastq.gz	HypoTMAzMyJzOBz635_sorted.bam
SAMN04537281	OB-636	MA/MyJ	HypoTMAzMyJzOBz636	230	19187017	17613220	624012	18237232	4215388	4135587	95.05	91.8	1.89	Sample_MA_MyJ-OB-636_R1.fastq.gz	Sample_MA_MyJ-OB-636_R2.fastq.gz	HypoTMAzMyJzOBz636_sorted.bam
SAMN04537282	OB-637	MA/MyJ	HypoTMAzMyJzOBz637	231	14321222	13126993	454828	13581821	3072265	3014350	94.84	91.66	1.89	Sample_MA_MyJ-OB-637_R1.fastq.gz	Sample_MA_MyJ-OB-637_R2.fastq.gz	HypoTMAzMyJzOBz637_sorted.bam
SAMN04537283	OB-656	NON/LtJ	HypoTNONzSHiLtJzOBz656	232	16486991	15149005	524067	15673072	3508409	3440971	95.06	91.88	1.92	Sample_NON_SHiLtJ-OB-656_R1.fastq.gz	Sample_NON_SHiLtJ-OB-656_R2.fastq.gz	HypoTNONzSHiLtJzOBz656_sorted.bam
SAMN04537284	OB-71	NON/LtJ	HypoTNONzSHiLtJzOBz71	233	13036000	11974563	414160	12388723	2830271	2776963	95.03	91.86	1.88	Sample_NON_SHiLtJ-OB-71_R1.fastq.gz	Sample_NON_SHiLtJ-OB-71_R2.fastq.gz	HypoTNONzSHiLtJzOBz71_sorted.bam
SAMN04537285	OB-72	NON/LtJ	HypoTNONzSHiLtJzOBz72	234	12346959	11313078	389781	11702859	2630025	2579951	94.78	91.63	1.9	Sample_NON_SHiLtJ-OB-72_R1.fastq.gz	Sample_NON_SHiLtJ-OB-72_R2.fastq.gz	HypoTNONzSHiLtJzOBz72_sorted.bam
SAMN04537286	OB-1473	NZB/BlNJ	HypoTNZBzBlNJzOBz1473	235	20995949	19105199	738008	19843207	4460440	4378075	94.51	90.99	1.85	Sample_NZB_BlNJ-OB-1473_R1.fastq.gz	Sample_NZB_BlNJ-OB-1473_R2.fastq.gz	HypoTNZBzBlNJzOBz1473_sorted.bam
SAMN04537287	OB-1474	NZB/BlNJ	HypoTNZBzBlNJzOBz1474	236	20021465	17552920	669359	18222279	3968317	3895146	91.01	87.67	1.84	Sample_NZB_BlNJ-OB-1474_R1.fastq.gz	Sample_NZB_BlNJ-OB-1474_R2.fastq.gz	HypoTNZBzBlNJzOBz1474_sorted.bam
SAMN04537288	OB-1475	NZB/BlNJ	HypoTNZBzBlNJzOBz1475	237	8361799	7594109	289812	7883921	1711303	1679539	94.28	90.82	1.86	Sample_NZB_BlNJ-OB-1475_R1.fastq.gz	Sample_NZB_BlNJ-OB-1475_R2.fastq.gz	HypoTNZBzBlNJzOBz1475_sorted.bam
SAMN04537289	OB-1269	NZW/LacJ	HypoTNZWzLacJzOBz1269	238	13791001	12528008	430531	12958539	2848618	2793932	93.96	90.84	1.92	Sample_NZW_LacJ-OB-1269_R1.fastq.gz	Sample_NZW_LacJ-OB-1269_R2.fastq.gz	HypoTNZWzLacJzOBz1269_sorted.bam
SAMN04537290	OB-1370	NZW/LacJ	HypoTNZWzLacJzOBz1370	239	12920920	11750953	417427	12168380	2812381	2759070	94.18	90.95	1.9	Sample_NZW_LacJ-OB-1370_R1.fastq.gz	Sample_NZW_LacJ-OB-1370_R2.fastq.gz	HypoTNZWzLacJzOBz1370_sorted.bam
SAMN04537291	OB-1371	NZW/LacJ	HypoTNZWzLacJzOBz1371	240	13548095	12331325	434689	12766014	2841920	2787751	94.23	91.02	1.91	Sample_NZW_LacJ-OB-1371_R1.fastq.gz	Sample_NZW_LacJ-OB-1371_R2.fastq.gz	HypoTNZWzLacJzOBz1371_sorted.bam
SAMN04537292	OB-585	PL/J	HypoTPLzJzOBz585	241	19402574	17518906	690663	18209569	3915944	3843678	93.85	90.29	1.85	Sample_PL_J-OB-585_R1.fastq.gz	Sample_PL_J-OB-585_R2.fastq.gz	HypoTPLzJzOBz585_sorted.bam
SAMN04537293	OB-586	PL/J	HypoTPLzJzOBz586	242	13427739	12129012	465419	12594431	2682383	2632665	93.79	90.33	1.85	Sample_PL_J-OB-586_R1.fastq.gz	Sample_PL_J-OB-586_R2.fastq.gz	HypoTPLzJzOBz586_sorted.bam
SAMN04537294	OB-616	RIIIS/J	HypoTRIIISzJzOBz616	243	15828798	14465105	544352	15009457	3477483	3412937	94.82	91.38	1.86	Sample_RIIIS_J-OB-616_R1.fastq.gz	Sample_RIIIS_J-OB-616_R2.fastq.gz	HypoTRIIISzJzOBz616_sorted.bam
SAMN04537295	OB-617	RIIIS/J	HypoTRIIISzJzOBz617	244	14038249	12863686	481403	13345089	3128030	3069071	95.06	91.63	1.88	Sample_RIIIS_J-OB-617_R1.fastq.gz	Sample_RIIIS_J-OB-617_R2.fastq.gz	HypoTRIIISzJzOBz617_sorted.bam
SAMN04537296	OB-618	RIIIS/J	HypoTRIIISzJzOBz618	245	13163000	12016384	448025	12464409	2814061	2760778	94.69	91.29	1.89	Sample_RIIIS_J-OB-618_R1.fastq.gz	Sample_RIIIS_J-OB-618_R2.fastq.gz	HypoTRIIISzJzOBz618_sorted.bam
SAMN04537297	OB-528	SEA/GnJ	HypoTSEAzGnJzOBz528	246	14413009	13183525	495627	13679152	3238575	3178614	94.91	91.47	1.85	Sample_SEA_GnJ-OB-528_R1.fastq.gz	Sample_SEA_GnJ-OB-528_R2.fastq.gz	HypoTSEAzGnJzOBz528_sorted.bam
SAMN04537298	OB-529	SEA/GnJ	HypoTSEAzGnJzOBz529	247	16062443	14586765	564257	15151022	3412392	3350522	94.33	90.81	1.81	Sample_SEA_GnJ-OB-529_R1.fastq.gz	Sample_SEA_GnJ-OB-529_R2.fastq.gz	HypoTSEAzGnJzOBz529_sorted.bam
SAMN04537299	OB-530	SEA/GnJ	HypoTSEAzGnJzOBz530	248	19724299	17909380	708372	18617752	4039820	3967269	94.39	90.8	1.8	Sample_SEA_GnJ-OB-530_R1.fastq.gz	Sample_SEA_GnJ-OB-530_R2.fastq.gz	HypoTSEAzGnJzOBz530_sorted.bam
SAMN04537300	OB-1390	SJL/J	HypoTSJLzJzOBz1390	249	11981022	10989937	377811	11367748	2567986	2517147	94.88	91.73	1.98	Sample_SJL_J-OB-1390_R1.fastq.gz	Sample_SJL_J-OB-1390_R2.fastq.gz	HypoTSJLzJzOBz1390_sorted.bam
SAMN04537301	OB-1391	SJL/J	HypoTSJLzJzOBz1391	250	13083635	11989839	411470	12401309	2780057	2725514	94.78	91.64	1.96	Sample_SJL_J-OB-1391_R1.fastq.gz	Sample_SJL_J-OB-1391_R2.fastq.gz	HypoTSJLzJzOBz1391_sorted.bam
SAMN04537302	OB-1353	SM/J	HypoTSMzJzOBz1353	251	10758858	9915385	333847	10249232	2367976	2322002	95.26	92.16	1.94	Sample_SM_J-OB-1353_R1.fastq.gz	Sample_SM_J-OB-1353_R2.fastq.gz	HypoTSMzJzOBz1353_sorted.bam
SAMN04537303	OB-1354	SM/J	HypoTSMzJzOBz1354	252	8918818	8201664	275325	8476989	1931757	1893844	95.05	91.96	1.96	Sample_SM_J-OB-1354_R1.fastq.gz	Sample_SM_J-OB-1354_R2.fastq.gz	HypoTSMzJzOBz1354_sorted.bam
SAMN04537304	OB-1467	SM/J	HypoTSMzJzOBz1467	253	8876716	8144938	274973	8419911	1927934	1892362	94.85	91.76	1.85	Sample_SM_J-OB-1467_R1.fastq.gz	Sample_SM_J-OB-1467_R2.fastq.gz	HypoTSMzJzOBz1467_sorted.bam
SAMN04537305	OB-170	SWR/J	HypoTSWRzJzOBz170	254	12430735	11245052	407401	11652453	2571780	2524505	93.74	90.46	1.84	Sample_SWR_J-OB-170_R1.fastq.gz	Sample_SWR_J-OB-170_R2.fastq.gz	HypoTSWRzJzOBz170_sorted.bam
SAMN04537306	OB-171	SWR/J	HypoTSWRzJzOBz171	255	13175096	12017881	440710	12458591	2643760	2594549	94.56	91.22	1.86	Sample_SWR_J-OB-171_R1.fastq.gz	Sample_SWR_J-OB-171_R2.fastq.gz	HypoTSWRzJzOBz171_sorted.bam
SAMN04537307	OB-172	SWR/J	HypoTSWRzJzOBz172	256	12137721	11128288	411233	11539521	2567748	2521074	95.07	91.68	1.82	Sample_SWR_J-OB-172_R1.fastq.gz	Sample_SWR_J-OB-172_R2.fastq.gz	HypoTSWRzJzOBz172_sorted.bam
